# Supplementary material for: Peptidoglycan recycling is critical for cell division, cell wall integrity and β-lactam resistance in Caulobacter crescentus
Source: bioRxiv preprint, doi:10.1101/2025.10.15.682734, version 2 (2026-02-11)
Supplement: Source data 1 [file 682734_file09.xlsx]

## Sheet: Fig. 2-fig. suppl. 5B
	MS peak areas raw data							Statistics of individual replicates												Statistics of conditions									Statistics of comparison of means between conditions
			MS peak area [cps]					GlcNAc-anhMurNAc-tetrapeptide												GlcNAc-anhMurNAc-tetrapeptide									anhMurNAc-tetrapeptide
			GlcNAc-anhMurNac-tetrapeptide	GlcNAc-anhMurNac-tetrapeptide + NagZ	GlcNAc-anhMurNac-tetrapeptide + NagZ +AmiR	GlcNAc-anhMurNac-tetrapeptide + NagZ +AmiR*		#	Condition	Replicate	n	Mean	SD	SEM	95%CI_lo	95%CI_hi	Median	p(Shapiro-Wilk)		#	Condition	n	Mean	SD	SEM	95%CI_lo	95%CI_hi		#	Condition	Difference	95%CI_lo	95%CI_hi	p value
	GlcNAc-anhMurNac-tetrapeptide	1. replicate	2166823	not detectable	not detectable	not detectable		1	GlcNAc-anhMurNac-tetrapeptide	1	1	2166823	-	-	-	-	2166823	-		1	GlcNAc-anhMurNac-tetrapeptide	3	2.1315e+06	87482.4	50508	1.91418e+06	2.34882e+06		1	GlcNAc-anhMurNac-tetrapeptide vs GlcNAc-anhMurNac-tetrapeptide + NagZ	1.38605e+07	1.29078e+07	1.48132e+07	0.00025506
		2. replicate	2031882	not detectable	not detectable	not detectable		2	GlcNAc-anhMurNac-tetrapeptide	2	1	2031882	-	-	-	-	2031882	-		2	GlcNAc-anhMurNac-tetrapeptide + NagZ	3	not detectable	not detectable	not detectable	not detectable	not detectable		2	GlcNAc-anhMurNac-tetrapeptide vs GlcNAc-anhMurNac-tetrapeptide + NagZ + AmiR	-619	-54535.7	53297.7	0.965258
		3. replicate	2195803	not detectable	not detectable	not detectable		3	GlcNAc-anhMurNac-tetrapeptide	3	1	2195803	-	-	-	-	2195803	-		3	GlcNAc-anhMurNac-tetrapeptide + NagZ +AmiR	3	not detectable	not detectable	not detectable	not detectable	not detectable		3	GlcNAc-anhMurNac-tetrapeptide vs GlcNAc-anhMurNac-tetrapeptide + NagZ + AmiR*	1.21226e+07	1.12922e+07	1.2953e+07	0.00025332
	anhMurNAc-tetrapeptide	1. replicate	15676	13452719	40636	12484717		4	GlcNAc-anhMurNac-tetrapeptide + NagZ	1	1	not detectable	-	-	-	-	not detectable	-		4	GlcNAc-anhMurNac-tetrapeptide + NagZ +AmiR*	3	52.3333	90.644	52.3333	-172.839	277.505
		2. replicate	15557	14199276	482	12114461		5	GlcNAc-anhMurNac-tetrapeptide + NagZ	2	1	not detectable	-	-	-	-	not detectable	-
		3. replicate	17627	13978358	5885	11817508		6	GlcNAc-anhMurNac-tetrapeptide + NagZ	3	1	not detectable	-	-	-	-	not detectable	-											anhMurNAc
	anhMurNAc	1. replicate	56211	3699390	33158525	4819385		7	GlcNAc-anhMurNac-tetrapeptide + NagZ +AmiR	1	1	not detectable	-	-	-	-	not detectable	-		anhMurNAc-tetrapeptide									#	Condition	Difference	95%CI_lo	95%CI_hi	p value
		2. replicate	53887	3207828	31202210	3661436		8	GlcNAc-anhMurNac-tetrapeptide + NagZ +AmiR	2	1	not detectable	-	-	-	-	not detectable	-		#	Condition	n	Mean	SD	SEM	95%CI_lo	95%CI_hi		1	GlcNAc-anhMurNac-tetrapeptide vs GlcNAc-anhMurNac-tetrapeptide + NagZ	3515014	2.71529e+06	4.31474e+06	0.00277818
		3. replicate	66341	3814263	33462643	4308477		9	GlcNAc-anhMurNac-tetrapeptide + NagZ +AmiR	3	1	not detectable	-	-	-	-	not detectable	-		1	GlcNAc-anhMurNac-tetrapeptide	3	16286.7	1162.29	671.047	13399.4	19173.9		2	GlcNAc-anhMurNac-tetrapeptide vs GlcNAc-anhMurNac-tetrapeptide + NagZ + AmiR	3.2549e+07	2.95017e+07	3.55962e+07	0.00047298
	tetrapeptide	1. replicate	3958	10737	1052590	16187		10	GlcNAc-anhMurNac-tetrapeptide + NagZ +AmiR*	1	1	157	-	-	-	-	157	-		2	GlcNAc-anhMurNac-tetrapeptide + NagZ	3	1.38768e+07	383503	221416	1.29241e+07	1.48295e+07		3	GlcNAc-anhMurNac-tetrapeptide vs GlcNAc-anhMurNac-tetrapeptide + NagZ + AmiR*	4.20429e+06	2.76299e+06	5.64558e+06	0.00628529
		2. replicate	3531	7330	881227	13027		11	GlcNAc-anhMurNac-tetrapeptide + NagZ +AmiR*	2	1	not detectable	-	-	-	-	not detectable	-		3	GlcNAc-anhMurNac-tetrapeptide + NagZ +AmiR	3	15667.7	21791.3	12581.2	-38465	69800.3
		3. replicate	4181	11050	1127713	14705		12	GlcNAc-anhMurNac-tetrapeptide + NagZ +AmiR*	3	1	not detectable	-	-	-	-	not detectable	-		4	GlcNAc-anhMurNac-tetrapeptide + NagZ +AmiR*	3	1.21389e+07	334275	192994	1.13085e+07	1.29693e+07
								anhMurNAc-tetrapeptide												anhMurNAc
								#	Condition	Replicate	n	Mean	SD	SEM	95%CI_lo	95%CI_hi	Median	p(Shapiro-Wilk)		#	Condition	n	Mean	SD	SEM	95%CI_lo	95%CI_hi		tetrapeptide
								1	GlcNAc-anhMurNac-tetrapeptide	1	1	15676	-	-	-	-	15676	-		1	GlcNAc-anhMurNac-tetrapeptide	3	58813	6622.18	3823.32	42362.6	75263.4		#	Condition	Difference	95%CI_lo	95%CI_hi	p value
								2	GlcNAc-anhMurNac-tetrapeptide	2	1	15557	-	-	-	-	15557	-		2	GlcNAc-anhMurNac-tetrapeptide + NagZ	3	3573827	322126	185980	2.77362e+06	4.37403e+06		1	GlcNAc-anhMurNac-tetrapeptide vs GlcNAc-anhMurNac-tetrapeptide + NagZ	5815.67	859.79	10771.5	0.0366115
								3	GlcNAc-anhMurNac-tetrapeptide	3	1	17627	-	-	-	-	17627	-		3	GlcNAc-anhMurNac-tetrapeptide + NagZ +AmiR	3	3.26078e+07	1.22673e+06	708253	2.95604e+07	3.56552e+07		2	GlcNAc-anhMurNac-tetrapeptide vs GlcNAc-anhMurNac-tetrapeptide + NagZ + AmiR	1016620	702788	1.33045e+06	0.00510804
								4	GlcNAc-anhMurNac-tetrapeptide + NagZ	1	1	13452719	-	-	-	-	13452719	-		4	GlcNAc-anhMurNac-tetrapeptide + NagZ +AmiR*	3	4.2631e+06	580307	335040	2.82154e+06	5.70466e+06		3	GlcNAc-anhMurNac-tetrapeptide vs GlcNAc-anhMurNac-tetrapeptide + NagZ + AmiR*	10749.7	7030.34	14469	0.00545992
								5	GlcNAc-anhMurNac-tetrapeptide + NagZ	2	1	14199276	-	-	-	-	14199276	-
								6	GlcNAc-anhMurNac-tetrapeptide + NagZ	3	1	13978358	-	-	-	-	13978358	-
								7	GlcNAc-anhMurNac-tetrapeptide + NagZ +AmiR	1	1	40636	-	-	-	-	40636	-		tetrapeptide
								8	GlcNAc-anhMurNac-tetrapeptide + NagZ +AmiR	2	1	482	-	-	-	-	482	-		#	Condition	n	Mean	SD	SEM	95%CI_lo	95%CI_hi
								9	GlcNAc-anhMurNac-tetrapeptide + NagZ +AmiR	3	1	5885	-	-	-	-	5885	-		1	GlcNAc-anhMurNac-tetrapeptide	3	3890	330.292	190.694	3069.51	4710.49
								10	GlcNAc-anhMurNac-tetrapeptide + NagZ +AmiR*	1	1	12484717	-	-	-	-	12484717	-		2	GlcNAc-anhMurNac-tetrapeptide + NagZ	3	2063.33	1191.26	4580.07	14831.3	4.37403e+06
								11	GlcNAc-anhMurNac-tetrapeptide + NagZ +AmiR*	2	1	12114461	-	-	-	-	12114461	-		3	GlcNAc-anhMurNac-tetrapeptide + NagZ +AmiR	3	126336	72939.9	706675	1.33435e+06	3.56552e+07
								12	GlcNAc-anhMurNac-tetrapeptide + NagZ +AmiR*	3	1	11817508	-	-	-	-	11817508	-		4	GlcNAc-anhMurNac-tetrapeptide + NagZ +AmiR*	3	14639.7	1581.01	912.798	10712.2	18567.1
								anhMurNAc
								#	Condition	Replicate	n	Mean	SD	SEM	95%CI_lo	95%CI_hi	Median	p(Shapiro-Wilk)
								1	GlcNAc-anhMurNac-tetrapeptide	1	1	56211	-	-	-	-	56211	-
								2	GlcNAc-anhMurNac-tetrapeptide	2	1	53887	-	-	-	-	53887	-
								3	GlcNAc-anhMurNac-tetrapeptide	3	1	66341	-	-	-	-	66341	-
								4	GlcNAc-anhMurNac-tetrapeptide + NagZ	1	1	3699390	-	-	-	-	3699390	-
								5	GlcNAc-anhMurNac-tetrapeptide + NagZ	2	1	3207828	-	-	-	-	3207828	-
								6	GlcNAc-anhMurNac-tetrapeptide + NagZ	3	1	3814263	-	-	-	-	3814263	-
								7	GlcNAc-anhMurNac-tetrapeptide + NagZ +AmiR	1	1	33158525	-	-	-	-	33158525	-
								8	GlcNAc-anhMurNac-tetrapeptide + NagZ +AmiR	2	1	31202210	-	-	-	-	31202210	-
								9	GlcNAc-anhMurNac-tetrapeptide + NagZ +AmiR	3	1	33462643	-	-	-	-	33462643	-
								10	GlcNAc-anhMurNac-tetrapeptide + NagZ +AmiR*	1	1	4819385	-	-	-	-	4819385	-
								11	GlcNAc-anhMurNac-tetrapeptide + NagZ +AmiR*	2	1	3661436	-	-	-	-	3661436	-
								12	GlcNAc-anhMurNac-tetrapeptide + NagZ +AmiR*	3	1	4308477	-	-	-	-	4308477	-
								tetrapeptide
								#	Condition	Replicate	n	Mean	SD	SEM	95%CI_lo	95%CI_hi	Median	p(Shapiro-Wilk)
								1	GlcNAc-anhMurNac-tetrapeptide	1	1	3958	-	-	-	-	3958	-
								2	GlcNAc-anhMurNac-tetrapeptide	2	1	3531	-	-	-	-	3531	-
								3	GlcNAc-anhMurNac-tetrapeptide	3	1	4181	-	-	-	-	4181	-
								4	GlcNAc-anhMurNac-tetrapeptide + NagZ	1	1	10737	-	-	-	-	10737	-
								5	GlcNAc-anhMurNac-tetrapeptide + NagZ	2	1	7330	-	-	-	-	7330	-
								6	GlcNAc-anhMurNac-tetrapeptide + NagZ	3	1	11050	-	-	-	-	11050	-
								7	GlcNAc-anhMurNac-tetrapeptide + NagZ +AmiR	1	1	1052590	-	-	-	-	1052590	-
								8	GlcNAc-anhMurNac-tetrapeptide + NagZ +AmiR	2	1	881227	-	-	-	-	881227	-
								9	GlcNAc-anhMurNac-tetrapeptide + NagZ +AmiR	3	1	1127713	-	-	-	-	1127713	-
								10	GlcNAc-anhMurNac-tetrapeptide + NagZ +AmiR*	1	1	16187	-	-	-	-	16187	-
								11	GlcNAc-anhMurNac-tetrapeptide + NagZ +AmiR*	2	1	13027	-	-	-	-	13027	-
								12	GlcNAc-anhMurNac-tetrapeptide + NagZ +AmiR*	3	1	14705	-	-	-	-	14705	-

## Sheet: Fig. 3B
	MS peak areas raw data						Statistics of individual replicates												Statistics of conditions									Statistics of comparison of means between conditions
			MS peak area [cps]				ahMurNAc-pentapeptide												#	Condition	n	Mean	SD	SEM	95%CI_lo	95%CI_hi		ahMurnNAC-pentapeptide
			WT	PR033	PR221		#	Condition	Replicate	n	Mean	SD	SEM	95%CI_lo	95%CI_hi	Median	p(Shapiro-Wilk)		1	WT ahMurNAc-pentapeptide	3	90566.7	43934.1	25365.4	-18571.6	199705		#	Condition	Difference	95%CI_lo	95%CI_hi	p value
	ahMurNAc-pentapeptide	1. replicate	141118	22991455	37489		1	WT	1	1	141000	-	-	-	-	141000	-		2	PR033 ahMurNAc-pentapeptide	3	2.28333e+07	288675	166667	2.21162e+07	2.35504e+07		1	WT vs PR033	2.27428e+07	2.20473e+07	2.34382e+07	3.711e-05
		2. replicate	70100	22973865	52928		2	WT	2	1	70100	-	-	-	-	70100	-		3	PR221 ahMurNAc-pentapeptide	3	47000	8307.23	4796.18	26363.7	67636.3		2	WT vs PR221	-43566.7	-147837	60704	0.225175
		3. replicate	60638	22544723	50576		3	WT	3	1	60600	-	-	-	-	60600	-		4	WT ahMurNAc-tetrapeptide	3	456667	71290.5	41159.6	279571	633762
	ahMurNAc-tetrapeptide	1. replicate	537873	13486685	2205750		4	PR033	1	1	23000000	-	-	-	-	23000000	-		5	PR033 ahMurNAc-tetrapeptide	3	1.33333e+07	1.25831e+06	726483	1.02075e+07	1.64591e+07		ahMurnNAC-tetrapeptide
		2. replicate	404836	14469615	1982121		5	PR033	2	1	23000000	-	-	-	-	23000000	-		6	PR221 ahMurNAc-tetrapeptide	3	1.75333e+06	602854	348058	255760	3.25091e+06		#	Condition	Difference	95%CI_lo	95%CI_hi	p value
		3. replicate	426555	12003473	1070181		6	PR033	3	1	22500000	-	-	-	-	22500000	-		7	WT ahMurNAc-tripeptide	3	16966.7	1607.28	927.961	12974	20959.4		1	WT vs PR033	1.28767e+07	9.76491e+06	1.59884e+07	0.00308863
	ahMurNAc-tripeptide	1. replicate	15799	3527334	205985		7	PR221	1	1	37500	-	-	-	-	37500	-		8	PR033 ahMurNAc-tripeptide	3	3.43667e+06	153080	88380.5	3.0564e+06	3.81694e+06		2	WT vs PR221	1.29667e+06	-172705	2.76604e+06	0.0631904
		2. replicate	18750	3263711	153652		8	PR221	2	1	52900	-	-	-	-	52900	-		9	PR221 ahMurNAc-pentapeptide	3	142400	70123.3	40485.7	-31796	316596
		3. replicate	16275	3515644	67183		9	PR221	3	1	50600	-	-	-	-	50600	-											ahMurnNAC-tripeptide
																												#	Condition	Difference	95%CI_lo	95%CI_hi	p value
							ahMurNAc-tetrapeptide																					1	WT vs PR033	3419700	3.03949e+06	3.79991e+06	0.00066646
							#	Condition	Replicate	n	Mean	SD	SEM	95%CI_lo	95%CI_hi	Median	p(Shapiro-Wilk)											2	WT vs PR221	125433	-48633.3	299500	0.0902137
							1	WT	1	1	538000	-	-	-	-	538000	-
							2	WT	2	1	405000	-	-	-	-	405000	-
							3	WT	3	1	427000	-	-	-	-	427000	-
							4	PR033	1	1	13500000	-	-	-	-	13500000	-
							5	PR033	2	1	14500000	-	-	-	-	14500000	-
							6	PR033	3	1	12000000	-	-	-	-	12000000	-
							7	PR221	1	1	2210000	-	-	-	-	2210000	-
							8	PR221	2	1	1980000	-	-	-	-	1980000	-
							9	PR221	3	1	1070000	-	-	-	-	1070000	-
							ahMurNAc-tripeptide
							#	Condition	Replicate	n	Mean	SD	SEM	95%CI_lo	95%CI_hi	Median	p(Shapiro-Wilk)
							1	WT	1	1	15800	-	-	-	-	15800	-
							2	WT	2	1	18800	-	-	-	-	18800	-
							3	WT	3	1	16300	-	-	-	-	16300	-
							4	PR033	1	1	3530000	-	-	-	-	3530000	-
							5	PR033	2	1	3260000	-	-	-	-	3260000	-
							6	PR033	3	1	3520000	-	-	-	-	3520000	-
							7	PR221	1	1	206000	-	-	-	-	206000	-
							8	PR221	2	1	154000	-	-	-	-	154000	-
							9	PR221	3	1	67200	-	-	-	-	67200	-

## Sheet: Fig. 3C
	MS peak areas raw data							Statistics of individual replicates												Statistics of conditions									Statistics of comparison of means between conditions
			MS peak area [cps]					#	Condition	Replicate	n	Mean	SD	SEM	95%CI_lo	95%CI_hi	Median	p(Shapiro-Wilk)		#	Condition	n	Mean	SD	SEM	95%CI_lo	95%CI_hi		#	Condition	Difference	95%CI_lo	95%CI_hi	p value
			WT	PR207	PR033	PR188		1	WT	1	1	355530	-	-	-	-	355530	-		1	WT	3	409352	190864	110195	-64779.1	883484		1	WT vs PR033	57635	-403210	518480	0.654474
	GlcNac-ahMurNAc	1. replicate	355530	1281328	490620	126972931		2	WT	2	1	251179	-	-	-	-	251179	-		2	PR207	3	1381892	130912	75582.1	1.05669e+06	1.7071e+06		2	WT vs PR207	972540	581769	1.36331e+06	0.00299338
		2. replicate	251179	1334434	436215	128272724		3	WT	3	1	621348	-	-	-	-	621348	-		3	PR033	3	466987	27896.4	16106	397689	536286		3	WT vs PR188	1.26267e+08	1.21956e+08	1.30578e+08	5.413e-05
		3. replicate	621348	1529914	474127	124783637		4	PR207	1	1	1281328	-	-	-	-	1281328	-		4	PR188	3	1.26676e+08	1.76334e+06	1.01806e+06	1.22296e+08	1.31057e+08
								5	PR207	2	1	1334434	-	-	-	-	1334434	-
								6	PR207	3	1	1529914	-	-	-	-	1529914	-
								7	PR033	1	1	490620	-	-	-	-	490620	-
								8	PR033	2	1	436215	-	-	-	-	436215	-
								9	PR033	3	1	474127	-	-	-	-	474127	-
								10	PR188	1	1	126972931	-	-	-	-	126972931	-
								11	PR188	2	1	128272724	-	-	-	-	128272724	-
								12	PR188	3	1	124783637	-	-	-	-	124783637	-

## Sheet: Fig. 4B
	Cell lengths raw data																									Statistics of individual replicates
	Cell length [µm]																									#	Condition	Replicate	n	Mean	SD	SEM	95%CI_lo	95%CI_hi	Median	p(Shapiro-Wilk)
	WT exp			WT stat			PR207 exp			PR207 stat			PR033 exp			PR033 stat			PR188 exp			PR188 stat				1	WT exp	1	100	2.83996	0.61797	0.0618	2.71734	2.96258	2.71532	0.021
	Replicate 1	Replicate 2	Replicate 3	Replicate 1	Replicate 2	Replicate 3	Replicate 1	Replicate 2	Replicate 3	Replicate 1	Replicate 2	Replicate 3	Replicate 1	Replicate 2	Replicate 3	Replicate 1	Replicate 2	Replicate 3	Replicate 1	Replicate 2	Replicate 3	Replicate 1	Replicate 2	Replicate 3		2	WT exp	2	100	2.92778	0.6481	0.06481	2.79919	3.05638	2.88194	0.003
	3.0329	2.32034	3.10668	3.21567	2.19654	1.93968	3.35327	4.55373	2.41563	2.84086	5.1939	2.51033	2.66389	4.36608	3.67125	2.50215	2.06549	9.27257	1.96707	2.28648	2.95272	2.30463	4.31008	1.861		3	WT exp	3	100	2.65489	0.58589	0.05859	2.53864	2.77115	2.52771	0
	3.42833	2.24793	2.16504	1.99813	2.30256	2.52182	2.06576	4.72206	2.71713	2.34956	5.2456	5.06039	2.59877	2.41593	3.29256	3.00781	2.22693	2.48312	2.56775	1.87496	3.44298	5.51595	2.58061	3.66802		4	WT stat	1	100	2.73462	0.64355	0.06435	2.60693	2.86232	2.61673	0
	3.13386	2.4717	3.77922	2.59005	2.85136	2.53053	4.82702	1.96306	2.69087	6.39233	6.15217	3.75537	6.18583	3.62408	4.52427	2.82301	3.32792	4.67698	3.29084	1.9896	1.98936	2.20928	2.69435	3.9064		5	WT stat	2	100	2.62097	0.52516	0.05252	2.51677	2.72518	2.47115	0
	2.53939	1.80939	2.27	2.17204	2.46373	2.05833	2.42443	2.30875	2.10978	4.77487	2.76168	2.96091	5.90979	3.62877	3.25696	3.29176	4.00037	6.32277	3.15857	1.70383	3.41845	2.97344	4.07153	1.80332		6	WT stat	3	100	2.62064	0.50238	0.05024	2.52096	2.72033	2.59468	0.001
	2.46091	2.43106	2.99368	2.13751	2.45994	3.07741	9.20368	1.91049	4.95454	9.9112	2.56474	3.00149	3.47052	3.4297	3.61639	2.32388	2.63381	3.52695	4.32046	2.62905	2.5728	2.07824	2.58058	2.45705		7	PR207 exp	1	100	3.24847	1.29943	0.12994	2.99064	3.50631	2.93341	0
	3.30799	2.17277	2.55265	2.13125	3.16899	3.201	2.87874	4.11002	2.40126	2.14309	2.16392	2.21051	2.9782	2.50875	5.2345	6.19615	3.02377	4.27825	2.36258	2.5487	2.56472	3.33401	3.41767	2.36689		8	PR207 exp	2	100	3.59842	1.84781	0.18478	3.23177	3.96506	3.19373	0
	2.83107	2.55755	2.64287	3.11257	1.84582	1.85485	3.29675	3.65667	2.65066	3.66429	4.15895	2.42933	5.0326	3.98369	4.09093	2.72088	2.99469	6.88214	3.41305	2.7631	2.9724	2.68185	2.39342	1.73589		9	PR207 exp	3	100	3.5359	1.38169	0.13817	3.26175	3.81006	3.26821	0
	3.14881	2.03139	2.6287	1.96524	3.26689	2.42705	2.91598	3.12891	4.40207	12.6467	3.12962	1.88328	2.78679	2.75807	5.05998	7.88554	5.12652	10.6727	3.7529	3.40711	4.70653	1.97214	2.3743	2.08758		10	PR207 stat	1	100	4.39712	2.63935	0.26394	3.87341	4.92082	3.54041	0
	2.60557	2.37909	2.04803	3.38628	2.18479	2.34967	2.25	2.11945	3.63938	4.64467	7.22384	4.99106	2.8074	2.49222	3.84263	2.44979	2.57494	2.64085	2.26491	3.11123	4.63026	2.95774	2.57138	2.54827		11	PR207 stat	2	100	4.90135	2.04452	0.20445	4.49567	5.30702	4.20411	0
	3.22273	3.86737	2.5947	2.37752	2.67374	2.02613	2.24317	3.47969	4.11053	2.28192	8.44084	2.87237	4.06782	3.56465	3.14718	3.42668	4.96949	2.55789	3.21156	2.32429	2.65929	3.87039	2.08138	2.96778		12	PR207 stat	3	100	4.14979	1.90207	0.19021	3.77238	4.5272	3.39685	0
	1.90721	2.44872	2.80832	3.4563	3.58568	2.56749	3.02942	2.52561	3.28207	3.93216	2.83987	4.02707	4.63941	5.3653	3.64987	3.83718	5.0814	3.24431	2.96241	2.32025	2.49398	4.31046	1.36917	3.09751		13	PR033 exp	1	100	3.56403	1.31691	0.13169	3.30273	3.82534	3.24779	0
	2.65283	3.27573	2.12833	2.82154	2.96719	2.18164	2.86335	1.81727	11.75	2.04749	3.58113	3.22901	2.40923	2.95751	3.0696	2.91093	4.07824	4.66332	2.19187	2.73047	2.63177	3.08955	4.76423	2.77211		14	PR033 exp	2	100	3.80326	1.35895	0.13589	3.53361	4.0729	3.41581	0
	1.9439	3.17935	2.13615	2.20934	2.25332	3.18313	6.34319	2.96545	3.47315	3.79941	6.65099	5.0719	2.26156	3.86053	3.87255	5.37207	4.76701	7.444	2.74035	4.79094	2.95895	2.11473	3.51926	3.22914		15	PR033 exp	3	100	3.72697	1.21804	0.1218	3.48528	3.96865	3.53678	0
	2.72076	2.7389	2.19832	1.87463	3.36731	2.27457	3.98232	2.79362	4.38901	3.28494	3.85291	2.64446	3.13714	3.54094	4.30262	3.96249	2.29045	3.59007	2.34168	2.70087	2.2974	2.68883	4.24807	2.66057		16	PR033 stat	1	100	3.76232	1.41435	0.14143	3.48169	4.04296	3.44099	0
	2.29463	2.53313	2.45348	2.71733	2.2842	2.60246	2.42245	4.45757	4.34678	2.78916	6.30844	2.06635	3.32201	3.14595	3.43675	4.27888	4.96965	2.50585	2.34201	2.90725	2.65873	3.04998	2.94314	3.59702		17	PR033 stat	2	100	4.13165	2.18895	0.2189	3.69732	4.56599	3.73919	0
	2.26482	2.87048	2.98509	2.92747	2.75692	2.90476	4.0524	2.43304	2.50243	2.64373	3.5714	2.58487	3.92997	3.1178	2.96327	4.06829	4.3419	5.44128	3.22267	2.29837	2.55267	2.16371	2.54964	4.38357		18	PR033 stat	3	100	3.99259	2.11434	0.21143	3.57306	4.41212	3.28917	0
	3.46481	2.89257	2.22605	3.0855	2.46916	2.78736	4.64067	3.09368	2.69767	4.02407	7.00655	3.0388	3.09862	4.98547	3.2389	3.98497	3.75985	4.43449	2.49856	3.02695	2.40724	2.57453	4.76265	2.96901		19	PR188 exp	1	100	2.83916	0.77176	0.07718	2.68603	2.99229	2.65187	0
	3.28498	3.23331	2.35672	2.39091	2.06389	2.22204	2.60688	2.44735	2.22252	4.25789	2.16426	2.55689	3.17205	2.81542	3.22685	2.90393	8.09055	2.3517	7.78668	2.28422	3.0362	2.12575	2.16113	3.68881		20	PR188 exp	2	100	2.82612	0.75826	0.07583	2.67567	2.97657	2.64571	0
	3.16123	2.34315	1.9749	1.81182	3.59024	2.90213	2.9333	2.84331	4.52741	2.89648	6.37562	2.36883	4.84331	2.91774	4.23468	4.00277	2.36015	2.49179	2.02855	2.34519	2.55638	2.50042	2.4434	2.50312		21	PR188 exp	3	100	3.02412	0.7384	0.07384	2.8776	3.17063	2.77933	0
	3.26706	3.69073	2.36244	2.56953	2.26965	2.78907	3.1354	3.22459	2.97753	4.19778	8.99295	2.97119	3.22878	2.6782	3.9627	2.89801	3.86203	3.74772	4.00828	3.1794	3.19669	2.38538	3.22312	3.69371		22	PR188 stat	1	100	2.89504	0.93899	0.0939	2.70872	3.08135	2.68534	0
	3.21772	4.00769	2.64867	3.50002	3.15888	2.48502	4.06477	3.04654	2.55583	3.26215	5.2828	6.47385	2.90785	3.80373	4.12004	3.83752	2.18718	5.80421	2.20882	3.11939	3.17973	1.79969	2.24353	2.91363		23	PR188 stat	2	100	2.95649	1.25337	0.12534	2.7078	3.20519	2.68422	0
	3.53658	2.89719	3.0252	2.96383	2.45644	3.66965	2.61709	2.23758	4.54116	3.75429	5.58236	4.2875	3.50078	4.40564	2.65368	3.60628	2.09691	2.83793	2.62936	3.4517	4.27961	3.27056	2.81572	2.13132		24	PR188 stat	3	100	2.96614	0.87639	0.08764	2.79224	3.14004	2.90374	0
	3.58892	3.16494	1.92809	2.55591	2.37082	2.96005	2.26776	2.35058	2.31484	2.15349	2.26258	7.64628	8.95466	2.65662	4.58175	3.46448	2.27059	2.94552	3.36749	2.81295	2.4824	1.99791	1.94474	2.29731
	2.80579	3.86887	3.04134	2.6868	3.70156	2.93355	2.60268	2.72076	3.12383	3.91273	2.82168	2.96411	3.9301	3.07226	4.00987	8.497	5.43074	2.77768	2.90538	2.54402	2.7349	2.57137	1.90164	2.68125
	2.55714	3.29289	4.13247	2.49904	2.17049	1.87633	2.51903	2.20971	2.37579	3.41863	3.61397	5.81174	3.38248	3.13886	3.46031	2.27683	6.72165	3.48456	2.07721	4.11398	3.19378	2.55447	2.08651	2.31569		Statistics of conditions
	3.07247	2.52079	3.50384	2.58466	3.06951	3.27883	2.85626	4.26152	2.75453	5.21442	3.87753	1.97951	2.56673	2.47933	5.886	8.9609	4.55948	2.10291	3.68122	2.82341	5.15717	3.47066	3.79599	4.32205
	2.50484	3.80636	2.1412	3.23185	2.65455	1.76056	1.96661	3.59805	2.65639	5.34642	3.89791	2.60334	2.96622	4.53883	3.76498	2.60467	3.13758	3.03133	3.25939	2.39357	2.51347	3.11719	1.73418	3.32063		#	Condition	n	Mean	SD	SEM	95%CI_lo	95%CI_hi
	2.70357	2.99904	2.15185	2.70306	2.16959	1.80556	2.82518	3.3661	4.84883	5.14818	6.74193	2.4165	2.38665	3.19626	4.21452	2.60576	2.10521	5.22688	2.50583	2.4997	2.55061	1.74712	3.63464	4.747		1	WT exp	3	2.80755	0.1393	0.08043	2.4615	3.15359
	2.95063	2.8713	2.80374	2.37032	2.06291	3.31646	2.48602	2.89522	3.72843	3.54658	4.66471	3.01826	3.48942	5.02169	3.59916	2.18754	4.84132	2.09615	2.92732	2.50482	4.67644	3.4572	3.08586	1.70122		2	WT stat	3	2.65875	0.06571	0.03794	2.49551	2.82198
	2.18616	2.11511	2.82121	2.0473	2.02079	2.26968	7.38108	5.6286	2.90414	3.46806	8.93717	3.42757	3.233	4.51626	2.83553	2.50024	6.47364	1.81346	2.70154	4.06602	2.31822	4.94251	2.59303	1.88976		3	PR207 exp	3	3.46093	0.18663	0.10775	2.99732	3.92455
	2.70988	3.53301	1.99872	2.49327	2.52	2.74788	3.09298	3.62398	2.37577	4.03536	5.41338	3.44536	2.78698	3.5302	3.7282	2.85726	3.95513	4.22999	3.21338	2.49257	2.7818	4.60481	2.70265	3.17474		4	PR207 stat	3	4.48275	0.38303	0.22114	3.53126	5.43424
	2.06911	2.62594	3.52306	2.53347	2.2197	2.37864	2.62828	3.13379	2.6353	5.99896	2.43178	2.97186	3.62079	3.95554	3.48873	3.70991	2.292	2.18416	4.40202	2.06629	2.252	2.37899	3.98523	4.30681		5	PR033 exp	3	3.69809	0.1222	0.07055	3.39452	4.00165
	1.86623	2.07296	2.68468	2.52946	2.81859	4.31734	4.69432	8.21672	2.34383	2.88441	8.81868	3.66617	3.15635	3.89247	4.23151	3.99838	2.29674	2.36217	1.88091	2.80457	2.89139	3.48836	2.25205	3.76573		6	PR033 stat	3	3.96219	0.18653	0.1077	3.49882	4.42556
	2.70689	2.97685	2.50588	3.08142	2.39171	2.69625	4.08862	4.6733	2.68843	8.43037	3.58835	6.03911	2.55176	2.67461	3.56418	6.23493	3.74401	3.49818	3.39786	2.05828	2.54762	2.64154	2.74488	2.6349		7	PR188 exp	3	2.89647	0.11074	0.06394	2.62137	3.17156
	3.80719	3.26643	2.65191	2.11004	2.09823	2.59882	2.64551	2.69328	2.59333	5.38603	5.71952	2.88304	3.23811	3.21203	2.66617	2.9571	11.3581	4.1585	2.28107	2.4772	2.3906	2.25674	2.04214	2.69126		8	PR188 stat	3	2.93922	0.03857	0.02227	2.84341	3.03504
	2.94403	2.11047	2.13123	2.13855	2.88917	2.95972	3.04117	3.6012	4.02074	4.66367	6.82942	2.4847	3.79467	3.93645	3.01066	7.3879	4.16688	16.1338	2.39626	2.78905	3.30172	2.18813	2.53228	2.97695
	2.48889	2.93255	2.30725	2.98403	2.53102	2.63245	3.2377	2.10208	4.50333	5.77621	7.79045	7.02591	2.77648	5.55498	3.06216	5.67566	5.99725	2.6308	3.65303	4.72466	2.77019	1.5127	2.81912	1.64703
	2.56564	2.49292	3.52309	2.84868	2.11366	2.45029	2.54179	2.96854	3.41765	4.11252	3.35184	5.92658	4.19083	2.9883	7.10905	3.10179	6.05803	6.06159	3.33606	2.30143	3.28925	2.59182	3.81389	3.65713		Statistics of comparison of means between conditions
	2.15682	2.47402	2.5764	2.5177	2.56155	2.29317	3.26242	2.65916	7.19947	4.07709	5.21761	1.97989	3.42341	2.9754	3.36356	4.03635	4.62821	2.76939	2.29889	3.52565	2.94195	4.57094	3.88965	1.73516
	2.10548	2.11223	2.84175	2.0564	2.61755	2.0091	2.41685	4.46044	8.97266	6.31103	3.93713	2.62422	3.74091	3.4727	3.69166	2.90377	8.43421	2.15342	2.10402	3.10594	3.75554	2.09817	3.0688	3.29338		#	Condition	Difference	95%CI_lo	95%CI_hi	p value
	2.056	2.61903	3.21771	2.66313	2.75269	2.0918	2.00477	2.74435	5.0952	2.64265	2.96499	4.53079	3.87091	2.83722	5.69237	3.01744	2.46223	2.46168	2.42845	4.51523	2.61325	3.30012	4.04061	6.33733		1	WT exp vs WT stat	-0.1488	-0.44053	0.14294	0.197694
	3.6936	2.6423	2.47308	1.97172	2.51612	2.57327	2.63499	3.34897	2.98123	4.62408	6.08423	6.6716	3.15756	4.61902	3.71134	3.04559	6.01745	2.49387	2.73298	2.99243	2.68148	3.49166	1.66027	2.56871		2	WT exp vs PR033 exp	0.89054	0.5915	1.18958	0.0012239
	2.84961	2.90466	2.40235	2.17057	2.59187	3.66179	2.45434	2.12044	3.67246	2.85335	7.81905	3.38854	4.92016	2.77368	3.30409	2.8567	3.3206	4.55972	2.54817	3.38197	2.65193	2.77866	2.15608	1.83866		3	WT exp vs PR033 stat	1.15464	0.76929	1.54	0.00141555
	3.25045	4.87257	1.94158	2.92068	3.51525	2.74657	2.42933	2.69942	4.88864	1.92067	4.65223	10.3243	3.45734	2.72267	3.02706	5.49554	2.77178	3.0578	2.86491	2.41782	2.96129	2.07835	1.85208	3.68525		4	WT exp vs PR207 exp	0.65339	0.26786	1.03892	0.0100621
	2.44843	2.47566	2.51434	2.49923	2.561	2.39728	2.54777	3.03031	2.27173	13.4657	10.5072	7.18555	2.82328	2.45277	3.50937	2.62059	4.17182	2.5149	2.47625	2.11113	3.73097	2.42136	3.3653	5.00527		5	WT exp vs PR207 stat	1.67521	0.8388	2.51161	0.0099103
	3.03681	3.01892	1.99181	2.8771	2.44403	2.09936	2.57213	3.46874	3.3287	3.53424	3.857	8.16881	3.09378	3.07835	4.13117	4.2093	3.69068	2.9241	3.01344	2.58307	2.46196	3.92692	3.08231	2.65851		6	WT exp vs PR188 exp	0.08892	-0.20216	0.38	0.437919
	2.17257	3.68874	2.62713	2.88572	2.18213	2.52344	2.65691	4.77134	3.9032	2.35125	5.57229	2.26723	2.39027	3.20367	2.67582	2.50836	3.62066	5.66751	2.45174	2.52179	3.75569	1.8927	3.47355	4.22881		7	WT exp vs PR188 stat	0.13168	-0.18551	0.44886	0.238935
	2.25868	3.48072	2.94231	1.98479	4.61432	2.34994	2.22247	3.40288	2.72178	2.65193	7.24341	4.54754	3.00589	3.23283	2.77933	3.6773	9.17976	7.17379	4.52902	4.79985	3.2975	1.90132	1.7115	2.69408
	3.62583	2.32575	3.27278	3.26732	2.42094	2.6924	2.33148	3.5524	3.07696	3.31282	2.64096	5.58223	4.0761	5.87218	2.8973	3.63358	7.12153	2.68104	2.51448	5.54373	2.70154	2.38554	3.44898	3.6849		#	Condition	Difference	95%CI_lo	95%CI_hi	p value
	2.76511	2.78909	1.93005	2.08586	2.32823	2.6412	4.86832	4.05568	2.84009	5.47347	4.04932	2.36547	11.7578	4.93609	3.01626	4.2742	2.88829	6.61447	2.19495	2.16694	2.61879	3.25593	3.30622	3.46002		1	WT stat vs WT exp	0.1488	-0.14294	0.44053	0.197694
	3.85897	1.88291	2.52121	2.39546	2.64092	2.13806	3.41995	15.3975	3.4322	2.73937	5.13183	2.19099	3.41964	4.2834	2.85344	2.53048	3.9202	2.09248	2.42949	1.76331	2.91277	2.32913	2.29493	2.06083		2	WT stat vs PR033 exp	1.03934	0.78755	1.29113	0.00088374
	2.38344	3.90718	2.49329	2.80324	2.03589	3.23557	3.28686	3.27952	2.66572	2.4962	6.00607	2.66403	3.81232	2.63892	3.95476	2.50391	4.77138	2.8166	2.49178	3.9747	2.69332	2.02811	2.12945	3.17359		3	WT stat vs PR033 stat	1.30344	0.89397	1.71291	0.00326747
	2.68715	2.84411	2.23456	3.00476	2.33336	2.23577	3.34977	2.85072	4.72354	2.08226	7.39304	3.07579	5.82652	2.84316	3.20257	3.54691	2.03458	5.08341	1.73852	2.91531	4.25425	5.4323	1.6647	1.60607		4	WT stat vs PR207 exp	0.80219	0.39247	1.2119	0.0106389
	2.07707	3.36383	2.6036	2.45034	2.44436	3.47487	3.92727	3.30993	3.24041	5.94909	5.91574	6.2492	3.74768	4.47268	3.43572	3.01656	6.84184	2.45639	2.63712	2.62709	3.68239	3.27355	1.99298	2.89385		5	WT stat vs PR207 stat	1.824	0.90822	2.73979	0.0124788
	2.12027	3.96163	2.46102	3.77943	2.46093	2.69715	3.04937	3.80318	2.24355	3.17669	4.15433	6.89358	5.21123	2.87126	3.10346	2.499	4.72225	6.25817	4.02292	1.98163	4.14851	2.55327	11.3747	2.29863		6	WT stat vs PR188 exp	0.23772	0.0112	0.46424	0.0441396
	2.67004	2.91042	2.53711	2.51924	2.36333	2.11879	3.10259	3.61253	3.50057	7.27785	6.00721	3.40517	2.48111	5.47654	3.76884	2.65023	1.79037	3.76087	3.92642	2.43158	2.42796	2.45773	6.54401	2.25978		7	WT stat vs PR188 stat	0.28048	0.14599	0.41496	0.0062186
	3.1172	2.93564	1.7849	2.69416	2.08019	2.05175	2.10596	2.1783	3.42807	2.25087	7.81651	7.93865	3.75217	3.14878	3.81568	3.95419	1.89641	3.92576	2.41253	1.921	2.62403	2.31718	2.62978	3.86898
	2.3588	3.01669	2.4523	3.33404	2.43628	2.45558	2.92172	4.69201	3.30377	3.67631	4.67278	4.74983	4.80342	3.20787	2.5549	2.51759	4.20222	3.06977	1.87994	2.31966	2.22898	3.36062	2.26208	2.36066		#	Condition	Difference	95%CI_lo	95%CI_hi	p value
	1.73018	2.13296	2.78687	2.01703	2.18484	1.9895	4.05572	2.88923	4.27265	4.29146	5.1684	2.39972	4.16827	6.6963	3.2478	3.59865	3.42409	2.33051	2.93517	2.86174	2.75861	2.20786	4.38841	2.58348		1	PR207exp vs WT exp	-0.65339	-1.03892	-0.26786	0.0100621
	3.20955	2.5336	2.23604	4.08952	3.04195	2.84206	2.97833	4.27218	3.34768	2.26857	7.57133	5.2765	3.54366	6.19831	3.16295	3.4022	9.50781	3.29087	3.20568	2.42648	3.5952	2.91236	1.95762	3.27084		2	PR207 exp vs WT stat	-0.80219	-1.2119	-0.39247	0.0106389
	2.49443	2.7277	2.66156	2.65557	2.71942	2.59054	2.10462	2.10199	3.45371	2.57471	6.20835	2.49513	3.08705	2.15251	3.1747	3.6877	4.30898	2.38405	2.29607	2.47538	2.96241	3.02714	1.76901	2.52483		3	PR207 exp vs PR033 exp	0.23715	-0.14415	0.61846	0.150731
	2.36614	2.95599	2.62877	2.54217	2.15287	2.29762	2.35462	4.66554	2.16838	10.4552	8.04102	3.03899	3.91847	3.20227	3.07801	3.14086	2.71738	2.52567	2.41447	3.58633	2.78848	2.4417	2.92826	2.32722		4	PR207 exp vs PR033 stat	0.50126	0.07828	0.92423	0.0302066
	3.07798	2.58295	4.16448	2.55433	2.49504	2.03252	2.31808	3.47498	3.81205	2.88838	5.34691	3.71379	2.97303	8.11038	3.10573	2.97003	8.08002	8.16621	3.26111	3.24285	2.1433	3.46511	1.83629	3.27876		5	PR207 exp vs PR207 stat	1.02182	0.22329	1.82035	0.0271027
	3.0852	3.50453	2.50601	2.52342	2.98598	2.60855	2.66827	2.11675	3.18833	4.98228	2.09944	3.51357	5.43705	3.26494	4.07387	3.92445	2.49547	3.08116	2.30155	3.32552	3.86134	3.41333	2.41231	2.94135		6	PR207 exp vs PR188 exp	-0.56447	-0.94622	-0.18271	0.0171492
	3.83188	3.33646	1.9721	1.85507	2.42085	2.74571	3.35363	3.48847	3.48882	8.26228	4.0699	6.42015	2.84447	6.36727	3.6797	3.28884	1.97776	4.20151	3.20074	2.96542	5.75323	2.53601	2.32853	3.23564		7	PR207 exp vs PR188 stat	-0.52171	-0.96121	-0.08221	0.0354905
	2.57774	3.78856	2.56733	3.48789	2.65162	2.79849	4.06232	3.77747	2.87448	2.5626	2.9767	6.10561	5.2417	2.61792	2.48784	2.43258	2.36175	5.16467	2.62972	2.66237	2.83267	3.72705	3.42371	3.3226
	1.95421	2.53665	3.41605	3.41494	2.95238	3.60939	2.75601	3.27355	2.57243	2.40139	1.92663	6.78106	3.28731	2.36503	2.54843	2.81573	3.47303	3.21424	2.69474	3.26093	2.97796	6.08411	4.11189	2.42016		#	Condition	Difference	95%CI_lo	95%CI_hi	p value
	3.22743	2.92449	2.19771	2.58526	2.49909	2.96692	3.69809	9.6458	3.16954	2.56874	4.31853	5.78926	2.77917	4.78364	2.66566	3.10535	2.26777	1.69096	2.59026	1.75918	4.07549	2.20024	2.82647	2.92499		1	PR033 exp vs WT exp	-0.89054	-1.18958	-0.5915	0.0012239
	2.62369	3.47214	3.91633	2.62522	2.31264	2.48974	3.60891	3.67185	3.69075	10.1571	3.29452	2.69453	3.05665	10.9607	3.90958	2.69151	3.69199	7.0967	2.07954	3.35906	2.73681	1.77627	2.32981	1.57392		2	PR033 exp vs WT stat	-1.03934	-1.29113	-0.78755	0.00088374
	4.15427	2.77281	3.08057	2.27351	3.30368	2.83177	3.43087	2.24157	3.35378	8.75901	3.99513	3.5419	2.49644	3.35	4.41777	4.17707	3.50564	3.46466	2.37996	4.26994	2.65643	2.26288	2.954	6.16385		3	PR033 exp vs PR033 stat	0.2641	-0.11701	0.64522	0.120631
	2.50856	2.36295	2.2491	2.06911	4.56542	4.37891	3.09678	8.91338	5.18747	2.68002	2.70687	2.51162	2.40681	2.61874	3.10968	4.00431	2.0719	2.93793	2.98516	2.96187	2.2459	2.64551	2.09881	3.11427		4	PR033 exp vs PR207 exp	-0.23715	-0.61846	0.14415	0.150731
	3.31411	5.12478	4.27896	1.91352	3.33229	2.39934	2.45083	2.75542	2.66146	2.17474	3.61678	3.17355	2.30976	4.52822	2.86422	3.817	3.99297	4.7233	2.92564	2.16648	2.77326	3.4508	4.06281	4.00775		5	PR033 exp vs PR207 stat	0.78466	-0.06957	1.6389	0.0597556
	2.96861	1.83981	2.51209	3.3042	2.15247	2.90794	3.04214	2.99944	3.3323	3.67623	4.23976	3.03922	2.91154	2.69072	3.43314	3.21333	3.32005	3.7554	2.61695	4.39007	3.62101	2.1437	2.89224	3.2759		6	PR033 exp vs PR188 exp	-0.80162	-1.06698	-0.53626	0.00113625
	2.44317	2.78814	3.50191	2.81294	2.69846	3.41944	2.67199	6.6597	4.83489	4.78217	8.2043	2.43818	2.49729	4.46404	2.47187	3.23998	2.24286	2.52062	2.46719	2.83662	2.63283	2.76123	2.67374	1.98578		7	PR033 exp vs PR188 stat	-0.75886	-1.03185	-0.48588	0.00492174
	1.9933	2.38847	3.94726	1.89535	2.37188	2.61115	3.43345	4.98866	2.81873	2.63327	3.69988	5.73058	3.61468	4.23211	4.2574	4.31183	2.24157	5.95213	2.7929	4.48317	2.6968	2.15715	3.23696	2.13821
	3.4864	2.46128	2.42948	2.81702	2.95926	2.61221	3.33188	5.14163	3.10796	2.97358	4.16845	3.20501	5.42704	2.69448	2.33795	4.57547	8.44662	4.54317	4.21368	2.49531	2.40019	2.31429	2.48528	2.45875		#	Condition	Difference	95%CI_lo	95%CI_hi	p value
	2.98551	3.57629	3.20861	3.15288	3.68332	2.38118	2.8889	2.74786	1.58095	5.93026	2.94195	8.32949	3.25748	4.92043	3.60196	2.50934	2.8049	4.81227	3.28483	2.53068	2.20116	2.83286	2.1328	1.92772		1	PR188 exp vs WT exp	-0.08892	-0.38	0.20216	0.437919
	2.19617	2.59165	2.56186	5.7042	2.72377	2.09715	2.49956	2.35672	2.65108	2.50734	3.34201	2.2962	3.35239	5.15783	4.11309	7.02787	3.84439	4.72794	3.25971	2.0438	2.93804	2.97162	3.81443	3.35031		2	PR188 exp vs WT stat	-0.23772	-0.46424	-0.0112	0.0441396
	3.85567	2.58063	2.55946	3.03014	2.59482	2.63794	2.55133	2.51612	5.42485	3.74107	3.74472	3.45561	3.21294	2.96593	4.71843	2.74401	2.72275	2.76785	2.70764	2.19935	2.9044	1.74334	2.79843	2.08203		3	PR188 exp vs PR033 exp	0.80162	0.53626	1.06698	0.00113625
	1.90369	3.04163	2.43569	4.6879	2.23352	2.44492	2.11743	3.20919	2.12056	3.11721	1.93722	4.04702	3.22717	5.38039	2.84056	3.54351	3.94813	2.46912	2.35483	2.2637	2.50139	4.59398	2.22818	2.07161		4	PR188 exp vs PR033 stat	1.06572	0.68418	1.44727	0.00248595
	2.53811	2.99897	3.23434	4.21784	2.40376	1.92722	2.68752	3.5549	3.72086	3.27569	5.49355	2.04809	2.70416	5.6444	4.57393	2.97921	2.44921	2.56691	2.58608	3.00522	3.9535	2.78574	1.93619	3.27876		5	PR188 exp vs PR207 exp	0.56447	0.18271	0.94622	0.0171492
	2.52374	3.51183	1.89004	2.37912	2.61171	2.22949	3.0534	2.4274	1.89509	5.66811	2.92089	2.19764	3.499	3.58517	3.65119	4.05698	2.32244	2.64297	2.8689	2.86948	4.46089	3.11147	2.67409	2.87678		6	PR188 exp vs PR207 stat	1.58628	0.71941	2.45316	0.0134247
	2.93909	3.2803	2.12472	2.36083	2.14287	2.63574	2.29919	2.73881	4.64779	1.71965	6.72568	6.10869	2.88679	3.40192	5.49123	3.79556	2.79137	2.26572	3.22252	2.48216	4.13148	1.8313	3.36038	2.72953		7	PR188 exp vs PR188 stat	0.04276	-0.20079	0.2863	0.581056
	2.41918	2.84781	1.9866	3.34059	2.14378	3.29571	3.14663	2.36816	4.7139	3.09102	2.49766	5.87161	3.18763	5.53426	3.11865	3.43561	3.88607	3.72197	2.18574	3.04428	2.95942	2.82892	2.44618	1.84987
	2.88047	2.92664	1.84907	3.40469	2.47315	2.97365	2.28979	2.64468	5.0225	3.28734	2.60946	2.29433	3.80832	5.31352	2.43681	3.27172	2.03456	3.62823	2.65296	1.90042	2.12833	1.66699	2.72648	3.47185
	4.43257	4.22689	3.54162	4.01378	2.36008	3.22195	3.10795	5.48732	2.70838	4.17176	6.82598	2.97719	2.64374	2.537	4.54995	8.92314	3.8623	3.87995	2.65078	3.0119	4.18724	2.25645	2.83299	3.19612
	3.93599	2.26643	3.1633	3.24204	3.23483	2.09686	7.34715	3.09835	3.25435	2.69342	3.56932	4.74896	3.84127	4.00126	4.86293	3.09376	2.14785	3.92475	3.07332	2.35311	3.28652	5.2545	2.32687	2.94538
	2.56326	2.05915	4.14137	2.60824	2.47456	2.81434	3.73598	2.0488	2.89283	2.69852	2.752	5.91938	3.29459	3.84722	3.61951	5.84319	7.13694	8.36784	3.14745	1.97935	2.88284	2.31517	2.98596	3.53398
	2.48461	2.44762	2.94016	3.26113	2.001	2.35575	4.11883	3.17826	4.96076	3.36006	3.4626	7.57419	3.52742	2.5498	2.70809	4.06496	4.279	2.80409	2.3626	2.07031	2.61596	4.01676	1.99038	3.60864
	4.20922	2.10391	2.41738	1.84113	3.28739	2.10105	3.07486	2.60109	2.49769	2.17239	9.58217	2.88441	4.05848	3.90062	11.8624	3.08378	3.87549	2.77966	2.83838	2.99365	2.24313	5.58775	2.46003	3.38907
	2.57147	4.09212	2.81059	2.77394	2.49476	3.07924	3.62047	2.64999	4.0814	12.1006	2.9959	3.20422	2.65628	5.21605	5.44651	3.67459	12.6082	4.97657	3.46249	2.90051	4.24104	2.7553	3.23324	3.02877
	2.60641	2.71072	2.24632	2.83848	2.16861	2.36557	1.73097	3.06441	3.87091	4.46809	8.6112	6.51242	3.43691	2.12481	5.14888	3.80842	2.41649	4.50882	2.87315	1.86244	2.58294	2.18481	5.24898	3.91626
	3.17392	3.89555	2.0635	2.74931	2.66734	2.329	3.16899	4.11238	3.20219	2.57844	7.26121	3.28377	2.40209	3.08779	3.19754	3.43158	3.73437	2.81807	2.8682	2.3946	2.77685	2.70711	2.66835	3.76334
	2.11774	2.27719	3.69983	1.98146	3.99883	2.61555	2.67349	3.49564	2.98838	8.48048	3.29396	2.51412	3.14118	3.79207	3.99007	6.23275	4.33737	2.58513	3.02194	2.78744	2.15889	2.75363	2.03516	2.74071
	4.31038	3.20875	2.5342	2.86641	2.41938	3.14714	4.20198	4.00434	4.40877	4.36625	3.08296	2.06541	3.59631	5.2212	3.2715	3.44637	2.94421	2.94447	2.14717	3.06233	2.46054	2.99862	3.21593	2.75605
	2.97472	3.0862	2.47005	2.30822	3.03194	2.02733	3.7249	3.21946	3.86885	6.67284	5.12456	7.1346	4.03454	2.99601	2.35244	3.69051	3.78892	2.69343	2.17147	2.86222	1.98645	2.87906	5.83862	2.74213
	1.96187	3.02561	1.65961	3.77845	2.13244	2.88265	9.39679	8.221	4.12855	2.89234	7.7573	4.57183	2.31932	2.36059	6.37468	2.97774	3.77448	4.67309	2.42227	2.5698	2.95472	3.37958	1.60284	2.73473
	2.82962	4.21064	2.3911	2.55189	2.21033	2.69655	2.93352	3.83386	2.3836	2.38244	3.12423	7.54702	2.1433	3.096	3.66406	3.59591	10.8683	4.25277	2.24086	4.01495	2.94533	3.20419	2.65375	2.44873
	3.92064	3.09075	2.42025	2.88282	2.02114	2.5404	2.33028	3.28164	3.94583	15.2526	3.48678	6.99901	3.00723	2.62311	2.12276	3.59592	2.24397	3.28747	2.44175	2.52749	3.91336	2.07093	2.85811	2.70309
	3.96715	3.21075	2.33301	2.35758	2.4434	3.01116	4.14063	2.58419	3.15251	3.09022	3.69016	4.41596	2.41537	3.92087	2.78365	4.20009	3.49195	2.9727	2.12755	2.48841	2.33078	3.90044	3.12955	3.03652

## Sheet: Fig. 4C
	Ampicillin spot dilution assays uncropped images

## Sheet: Fig. 4-fig. suppl. 1B
	Cell lengths raw data																						Statistics of individual replicates
	Cell length [µm]																						#	Condition	Replicate	n	Mean	SD	SEM	95%CI_lo	95%CI_hi	Median	p(Shapiro-Wilk)
	WT exp			PR207 exp			PR285 uninduced			PR033 exp			PR037 uninduced			PR188 exp			PR284 uninduced				1	WT exp	1	100	2.83996	0.61797	0.0618	2.71734	2.96258	2.71532	0.021
	Replicate 1	Replicate 2	Replicate 3	Replicate 1	Replicate 2	Replicate 3	Replicate 1	Replicate 2	Replicate 3	Replicate 1	Replicate 2	Replicate 3	Replicate 1	Replicate 2	Replicate 3	Replicate 1	Replicate 2	Replicate 3	Replicate 1	Replicate 2	Replicate 3		2	WT exp	2	100	2.92778	0.6481	0.06481	2.79919	3.05638	2.88194	0.003
	3.0329	2.32034	3.10668	3.35327	4.55373	2.41563	3.25743	2.39951	2.06604	2.66389	4.36608	3.67125	3.6278	2.64272	2.15399	1.96707	2.28648	2.95272	3.05269	3.3329	2.82599		3	WT exp	3	100	2.65489	0.58589	0.05859	2.53864	2.77115	2.52771	0
	3.42833	2.24793	2.16504	2.06576	4.72206	2.71713	2.81409	2.97894	2.23467	2.59877	2.41593	3.29256	2.4046	3.07248	4.19791	2.56775	1.87496	3.44298	2.06685	3.05118	2.52285		4	PR033 exp	1	100	3.56403	1.31691	0.13169	3.30273	3.82534	3.24779	0
	3.13386	2.4717	3.77922	4.82702	1.96306	2.69087	1.87952	2.5464	2.21671	6.18583	3.62408	4.52427	2.65205	3.16011	2.56972	3.29084	1.9896	1.98936	2.63541	3.73933	3.3255		5	PR033 exp	2	100	3.80326	1.35895	0.13589	3.53361	4.0729	3.41581	0
	2.53939	1.80939	2.27	2.42443	2.30875	2.10978	3.38974	2.29941	2.20186	5.90979	3.62877	3.25696	2.04855	3.17886	2.05757	3.15857	1.70383	3.41845	2.88892	2.49763	2.22263		6	PR033 exp	3	100	3.72697	1.21804	0.1218	3.48528	3.96865	3.53678	0
	2.46091	2.43106	2.99368	9.20368	1.91049	4.95454	2.4488	2.33746	3.15091	3.47052	3.4297	3.61639	2.4753	3.21838	2.93764	4.32046	2.62905	2.5728	4.57407	2.71889	1.99346		7	PR037 unind	1	100	2.87671	0.67302	0.0673	2.74316	3.01025	2.76919	0
	3.30799	2.17277	2.55265	2.87874	4.11002	2.40126	2.14584	2.78366	2.0172	2.9782	2.50875	5.2345	2.96891	2.32671	2.49618	2.36258	2.5487	2.56472	2.83718	3.12296	2.4993		8	PR037 unind	2	100	2.95266	0.67631	0.06763	2.81846	3.08685	2.82086	0.001
	2.83107	2.55755	2.64287	3.29675	3.65667	2.65066	4.50423	2.53897	3.08279	5.0326	3.98369	4.09093	1.94746	2.75577	3.79529	3.41305	2.7631	2.9724	2.76687	3.03925	3.28819		9	PR037 unind	3	100	2.96397	0.71394	0.07139	2.82231	3.10563	2.84424	0.001
	3.14881	2.03139	2.6287	2.91598	3.12891	4.40207	2.29327	2.13613	3.17583	2.78679	2.75807	5.05998	2.06613	2.13539	2.55826	3.7529	3.40711	4.70653	3.36232	2.22436	3.91872		10	PR188 exp	1	100	2.83916	0.77176	0.07718	2.68603	2.99229	2.65187	0
	2.60557	2.37909	2.04803	2.25	2.11945	3.63938	3.85244	2.25143	3.15736	2.8074	2.49222	3.84263	2.78145	2.87635	3.34833	2.26491	3.11123	4.63026	2.54717	2.22289	3.21847		11	PR188 exp	2	100	2.82612	0.75826	0.07583	2.67567	2.97657	2.64571	0
	3.22273	3.86737	2.5947	2.24317	3.47969	4.11053	1.94862	2.91416	2.202	4.06782	3.56465	3.14718	3.62174	2.52725	4.01902	3.21156	2.32429	2.65929	2.44644	3.32213	2.56964		12	PR188 exp	3	100	3.02412	0.7384	0.07384	2.8776	3.17063	2.77933	0
	1.90721	2.44872	2.80832	3.02942	2.52561	3.28207	2.22639	4.06462	2.66999	4.63941	5.3653	3.64987	2.8276	3.39364	4.02322	2.96241	2.32025	2.49398	3.00975	2.64212	3.1136		13	PR207exp	1	100	3.24847	1.29943	0.12994	2.99064	3.50631	2.93341	0
	2.65283	3.27573	2.12833	2.86335	1.81727	11.75	1.91836	2.13315	2.03188	2.40923	2.95751	3.0696	3.28052	2.64464	3.888	2.19187	2.73047	2.63177	2.12483	3.96943	3.34247		14	PR207exp	2	100	3.59842	1.84781	0.18478	3.23177	3.96506	3.19373	0
	1.9439	3.17935	2.13615	6.34319	2.96545	3.47315	3.18434	2.12807	2.22297	2.26156	3.86053	3.87255	2.95499	2.28027	3.42842	2.74035	4.79094	2.95895	2.49127	2.47066	2.23449		15	PR207exp	3	100	3.5359	1.38169	0.13817	3.26175	3.81006	3.26821	0
	2.72076	2.7389	2.19832	3.98232	2.79362	4.38901	2.97597	2.40829	2.52055	3.13714	3.54094	4.30262	2.46142	2.47819	3.40241	2.34168	2.70087	2.2974	2.2058	2.46834	2.68989		16	PR284 unind	1	100	2.87369	0.68971	0.06897	2.73684	3.01055	2.67021	0
	2.29463	2.53313	2.45348	2.42245	4.45757	4.34678	2.56833	2.64001	4.44632	3.32201	3.14595	3.43675	2.25547	2.00097	2.54909	2.34201	2.90725	2.65873	2.66621	2.44615	3.41972		17	PR284 unind	2	100	2.78962	0.68262	0.06826	2.65417	2.92507	2.60838	0
	2.26482	2.87048	2.98509	4.0524	2.43304	2.50243	2.70225	3.67553	2.84993	3.92997	3.1178	2.96327	2.25592	3.15962	3.4802	3.22267	2.29837	2.55267	3.58387	3.28205	2.64482		18	PR284 unind	3	100	2.87207	0.59426	0.05943	2.75416	2.98999	2.82583	0
	3.46481	2.89257	2.22605	4.64067	3.09368	2.69767	3.0055	4.11093	2.11829	3.09862	4.98547	3.2389	4.46759	2.07188	3.40898	2.49856	3.02695	2.40724	3.9263	2.39587	2.49813		19	PR285 unind	1	100	2.79055	0.71416	0.07142	2.64885	2.93226	2.64384	0
	3.28498	3.23331	2.35672	2.60688	2.44735	2.22252	5.60501	2.54719	2.84821	3.17205	2.81542	3.22685	3.41296	2.37232	4.3167	7.78668	2.28422	3.0362	2.5253	2.94686	3.7356		20	PR285 unind	2	100	2.77096	0.61863	0.06186	2.64821	2.89371	2.54679	0
	3.16123	2.34315	1.9749	2.9333	2.84331	4.52741	3.13305	3.26752	2.79267	4.84331	2.91774	4.23468	4.84902	2.34874	2.13522	2.02855	2.34519	2.55638	4.00617	4.18845	2.98758		21	PR285 unind	3	100	2.85415	0.7198	0.07198	2.71132	2.99697	2.74247	0
	3.26706	3.69073	2.36244	3.1354	3.22459	2.97753	3.284	2.36463	2.94065	3.22878	2.6782	3.9627	2.51939	3.09029	2.28745	4.00828	3.1794	3.19669	2.20312	3.28438	2.83249
	3.21772	4.00769	2.64867	4.06477	3.04654	2.55583	2.58651	2.19118	3.19309	2.90785	3.80373	4.12004	2.85704	3.23068	3.60337	2.20882	3.11939	3.17973	2.69128	2.89089	3.73589
	3.53658	2.89719	3.0252	2.61709	2.23758	4.54116	5.46597	2.69444	2.58092	3.50078	4.40564	2.65368	2.46437	3.64816	2.6128	2.62936	3.4517	4.27961	4.27616	2.55827	2.32205		Statistics of conditions
	3.58892	3.16494	1.92809	2.26776	2.35058	2.31484	2.8744	2.48674	2.63734	8.95466	2.65662	4.58175	3.30112	3.10033	3.53147	3.36749	2.81295	2.4824	2.23325	2.50967	2.4914
	2.80579	3.86887	3.04134	2.60268	2.72076	3.12383	2.93767	2.60827	3.18139	3.9301	3.07226	4.00987	4.46995	3.23658	3.1102	2.90538	2.54402	2.7349	2.4084	3.02609	1.8572		#	Condition	n	Mean	SD	SEM	95%CI_lo	95%CI_hi
	2.55714	3.29289	4.13247	2.51903	2.20971	2.37579	2.23995	4.72434	4.38326	3.38248	3.13886	3.46031	3.26707	2.96035	2.39862	2.07721	4.11398	3.19378	2.30287	2.39842	2.46227		1	WT exp	3	2.80755	0.1393	0.08043	2.4615	3.15359
	3.07247	2.52079	3.50384	2.85626	4.26152	2.75453	2.18559	2.53577	1.84288	2.56673	2.47933	5.886	2.56251	1.96469	4.42532	3.68122	2.82341	5.15717	3.33828	2.45994	2.57276		2	PR033 exp	3	3.69809	0.1222	0.07055	3.39452	4.00165
	2.50484	3.80636	2.1412	1.96661	3.59805	2.65639	2.10067	3.90603	2.55523	2.96622	4.53883	3.76498	2.34543	2.90261	4.10446	3.25939	2.39357	2.51347	3.47731	4.71217	2.53189		3	PR037 unind	3	2.93111	0.04745	0.0274	2.81323	3.04899
	2.70357	2.99904	2.15185	2.82518	3.3661	4.84883	2.9629	2.30769	3.59269	2.38665	3.19626	4.21452	2.49594	2.70316	4.53216	2.50583	2.4997	2.55061	2.81355	3.8107	3.8588		4	PR188 exp	3	2.89647	0.11074	0.06394	2.62137	3.17156
	2.95063	2.8713	2.80374	2.48602	2.89522	3.72843	2.3932	2.76565	2.52837	3.48942	5.02169	3.59916	2.57504	2.45136	3.32242	2.92732	2.50482	4.67644	3.14229	3.33638	2.9097		5	PR207exp	3	3.46093	0.18663	0.10775	2.99732	3.92455
	2.18616	2.11511	2.82121	7.38108	5.6286	2.90414	2.46667	2.49982	4.20403	3.233	4.51626	2.83553	2.40917	2.62718	2.86864	2.70154	4.06602	2.31822	2.68098	2.24131	2.37466		6	PR284 unind	3	2.84513	0.04808	0.02776	2.72569	2.96456
	2.70988	3.53301	1.99872	3.09298	3.62398	2.37577	3.56943	3.44154	2.93564	2.78698	3.5302	3.7282	2.88455	2.5742	2.63631	3.21338	2.49257	2.7818	4.45141	2.92146	2.10055		7	PR285 unind	3	2.80522	0.04349	0.02511	2.69719	2.91326
	2.06911	2.62594	3.52306	2.62828	3.13379	2.6353	1.8475	3.23809	2.80319	3.62079	3.95554	3.48873	2.73655	2.33819	2.14688	4.40202	2.06629	2.252	3.04455	2.953	3.92294
	1.86623	2.07296	2.68468	4.69432	8.21672	2.34383	3.02765	2.37218	4.02822	3.15635	3.89247	4.23151	2.63548	3.1423	3.60183	1.88091	2.80457	2.89139	2.42485	2.93814	2.88337
	2.70689	2.97685	2.50588	4.08862	4.6733	2.68843	2.24951	2.32242	2.74893	2.55176	2.67461	3.56418	2.42375	3.45747	2.09355	3.39786	2.05828	2.54762	3.44295	2.36235	3.14226		Statistics of comparison of means between conditions
	3.80719	3.26643	2.65191	2.64551	2.69328	2.59333	3.95858	2.74899	3.01607	3.23811	3.21203	2.66617	2.505	4.46716	2.02836	2.28107	2.4772	2.3906	2.48368	3.80739	2.91184
	2.94403	2.11047	2.13123	3.04117	3.6012	4.02074	2.18412	2.44808	3.52312	3.79467	3.93645	3.01066	2.35371	2.75974	2.64813	2.39626	2.78905	3.30172	4.38539	4.38623	2.887		#	Condition	Difference	95%CI_lo	95%CI_hi	p value
	2.48889	2.93255	2.30725	3.2377	2.10208	4.50333	2.41093	2.84877	2.59624	2.77648	5.55498	3.06216	4.17003	2.87497	3.8696	3.65303	4.72466	2.77019	2.39375	2.4116	2.67198		1	WT exp vs PR033 exp	0.89054	0.5915	1.18958	0.0012239
	2.56564	2.49292	3.52309	2.54179	2.96854	3.41765	3.15527	5.02752	2.7973	4.19083	2.9883	7.10905	3.72163	3.18837	2.90002	3.33606	2.30143	3.28925	2.77068	2.03758	3.01239		2	WT exp vs PR037 uninduced	0.12357	-0.1839	0.43103	0.260569
	2.15682	2.47402	2.5764	3.26242	2.65916	7.19947	2.18733	2.41996	3.47097	3.42341	2.9754	3.36356	3.29498	3.64714	2.50212	2.29889	3.52565	2.94195	2.52416	3.46777	3.02747		3	WT exp vs PR188 exp	0.08892	-0.20216	0.38	0.437919
	2.10548	2.11223	2.84175	2.41685	4.46044	8.97266	3.37889	2.74003	1.99168	3.74091	3.4727	3.69166	2.80533	2.13355	1.956	2.10402	3.10594	3.75554	1.99434	2.22508	2.71497		4	WT exp vs PR207 exp	0.65339	0.26786	1.03892	0.0100621
	2.056	2.61903	3.21771	2.00477	2.74435	5.0952	2.57085	2.23871	3.04307	3.87091	2.83722	5.69237	2.345	2.47687	2.65388	2.42845	4.51523	2.61325	2.32166	2.19634	2.38645		5	WT exp vs PR284 uninduced	0.03758	-0.26923	0.3444	0.694423
	3.6936	2.6423	2.47308	2.63499	3.34897	2.98123	3.40085	2.90857	4.27281	3.15756	4.61902	3.71134	3.51381	3.01759	5.351	2.73298	2.99243	2.68148	2.65683	2.26405	3.60662		6	WT exp vs PR285 uninduced	-0.00232	-0.31404	0.30939	0.98013
	2.84961	2.90466	2.40235	2.45434	2.12044	3.67246	3.54294	2.51311	3.66438	4.92016	2.77368	3.30409	4.30286	2.36041	2.81345	2.54817	3.38197	2.65193	2.61097	3.86902	3.26815
	3.25045	4.87257	1.94158	2.42933	2.69942	4.88864	2.43534	2.08132	3.86522	3.45734	2.72267	3.02706	3.24079	1.55254	2.44504	2.86491	2.41782	2.96129	3.14794	3.07199	4.00869
	2.44843	2.47566	2.51434	2.54777	3.03031	2.27173	2.61198	2.14681	2.83774	2.82328	2.45277	3.50937	2.44897	4.13721	2.53749	2.47625	2.11113	3.73097	2.34575	2.21349	2.56848		#	Condition	Difference	95%CI_lo	95%CI_hi	p value
	3.03681	3.01892	1.99181	2.57213	3.46874	3.3287	2.15567	2.52038	2.25921	3.09378	3.07835	4.13117	3.34534	2.35269	2.98987	3.01344	2.58307	2.46196	2.33596	2.26971	2.93363		1	PR033 exp vs WT exp	-0.89054	-1.18958	-0.5915	0.0012239
	2.17257	3.68874	2.62713	2.65691	4.77134	3.9032	2.90217	2.22837	2.0358	2.39027	3.20367	2.67582	3.33312	4.20975	3.08467	2.45174	2.52179	3.75569	2.66831	2.27266	2.25671		2	PR033 exp vs PR037 uninduced	-0.76698	-1.03093	-0.50302	0.00374727
	2.25868	3.48072	2.94231	2.22247	3.40288	2.72178	2.50921	3.72235	2.36494	3.00589	3.23283	2.77933	3.27074	4.54454	2.8719	4.52902	4.79985	3.2975	2.69301	2.85513	3.91923		3	PR033 exp vs PR188 exp	-0.80162	-1.06698	-0.53626	0.00113625
	3.62583	2.32575	3.27278	2.33148	3.5524	3.07696	2.86858	2.75223	2.30527	4.0761	5.87218	2.8973	3.45684	2.68006	2.92206	2.51448	5.54373	2.70154	3.45693	2.13333	2.77519		4	PR033 exp vs PR207 exp	-0.23715	-0.61846	0.14415	0.150731
	2.76511	2.78909	1.93005	4.86832	4.05568	2.84009	4.81285	2.51508	4.02596	11.7578	4.93609	3.01626	3.42382	2.76107	5.15295	2.19495	2.16694	2.61879	2.70243	2.30838	2.36909		5	PR033 exp vs PR284 uninduced	-0.85296	-1.11634	-0.58958	0.00280368
	3.85897	1.88291	2.52121	3.41995	15.3975	3.4322	3.13627	2.45412	2.05038	3.41964	4.2834	2.85344	4.07932	2.90415	2.10952	2.42949	1.76331	2.91277	3.77396	2.84019	2.6268		6	PR033 exp vs PR285 uninduced	-0.89287	-1.16066	-0.62507	0.00288839
	2.38344	3.90718	2.49329	3.28686	3.27952	2.66572	3.28743	2.70488	2.39043	3.81232	2.63892	3.95476	3.14833	3.00767	2.86166	2.49178	3.9747	2.69332	2.54203	1.94236	3.67077
	2.68715	2.84411	2.23456	3.34977	2.85072	4.72354	2.76669	2.05151	3.00229	5.82652	2.84316	3.20257	2.96673	2.18809	2.13089	1.73852	2.91531	4.25425	2.41058	2.24827	3.01187
	2.07707	3.36383	2.6036	3.92727	3.30993	3.24041	3.65102	2.33619	2.14956	3.74768	4.47268	3.43572	2.12298	2.1227	3.25858	2.63712	2.62709	3.68239	3.21454	4.171	2.6069		#	Condition	Difference	95%CI_lo	95%CI_hi	p value
	2.12027	3.96163	2.46102	3.04937	3.80318	2.24355	1.77447	4.57437	2.58524	5.21123	2.87126	3.10346	2.58071	2.25586	2.68279	4.02292	1.98163	4.14851	2.42334	2.42416	2.89313		1	PR188 exp vs WT exp	-0.08892	-0.38	0.20216	0.437919
	2.67004	2.91042	2.53711	3.10259	3.61253	3.50057	3.02861	2.67548	2.7341	2.48111	5.47654	3.76884	5.84114	3.63808	2.27771	3.92642	2.43158	2.42796	2.5869	2.02958	2.9572		2	PR188 exp vs PR033 exp	0.80162	0.53626	1.06698	0.00113625
	3.1172	2.93564	1.7849	2.10596	2.1783	3.42807	3.38866	2.74971	1.89688	3.75217	3.14878	3.81568	2.24524	2.67945	3.53939	2.41253	1.921	2.62403	2.92154	3.71881	2.4487		3	PR188 exp vs PR037 uninduced	0.03464	-0.20072	0.27001	0.656013
	2.3588	3.01669	2.4523	2.92172	4.69201	3.30377	2.59678	2.63257	2.70906	4.80342	3.20787	2.5549	2.38068	2.08675	3.04981	1.87994	2.31966	2.22898	3.48071	2.51202	3.71383		4	PR188 exp vs PR207 exp	0.56447	0.18271	0.94622	0.0171492
	1.73018	2.13296	2.78687	4.05572	2.88923	4.27265	2.84982	2.4185	2.10196	4.16827	6.6963	3.2478	3.30488	3.74769	3.13862	2.93517	2.86174	2.75861	4.65949	2.12573	2.91352		5	PR188 exp vs PR284 uninduced	-0.05134	-0.28621	0.18353	0.519609
	3.20955	2.5336	2.23604	2.97833	4.27218	3.34768	2.25644	2.90262	1.79026	3.54366	6.19831	3.16295	3.29341	2.79206	4.06845	3.20568	2.42648	3.5952	2.93988	2.77127	2.22751		6	PR188 exp vs PR285 uninduced	-0.09124	-0.33	0.14751	0.288527
	2.49443	2.7277	2.66156	2.10462	2.10199	3.45371	2.22527	1.98563	2.35713	3.08705	2.15251	3.1747	4.00444	2.04453	2.24878	2.29607	2.47538	2.96241	2.13076	1.99005	3.25999
	2.36614	2.95599	2.62877	2.35462	4.66554	2.16838	2.28118	3.1907	3.09728	3.91847	3.20227	3.07801	2.57746	2.48605	2.74457	2.41447	3.58633	2.78848	5.01296	2.77469	2.89747
	3.07798	2.58295	4.16448	2.31808	3.47498	3.81205	2.66667	3.73052	3.14972	2.97303	8.11038	3.10573	2.94436	3.8163	3.54153	3.26111	3.24285	2.1433	2.83451	2.61237	2.7359		#	Condition	Difference	95%CI_lo	95%CI_hi	p value
	3.0852	3.50453	2.50601	2.66827	2.11675	3.18833	2.62101	3.29245	3.26735	5.43705	3.26494	4.07387	2.5135	3.08683	2.95992	2.30155	3.32552	3.86134	3.55133	2.25419	2.75282		1	PR207 exp vs WT exp	-0.65339	-1.03892	-0.26786	0.0100621
	3.83188	3.33646	1.9721	3.35363	3.48847	3.48882	2.91043	2.88253	2.67851	2.84447	6.36727	3.6797	3.72907	2.8165	3.20706	3.20074	2.96542	5.75323	4.40342	2.47125	3.02868		2	PR207 exp vs PR033 exp	0.23715	-0.14415	0.61846	0.150731
	2.57774	3.78856	2.56733	4.06232	3.77747	2.87448	2.25979	3.19949	5.66723	5.2417	2.61792	2.48784	2.88616	4.04051	3.51283	2.62972	2.66237	2.83267	2.4115	2.10948	2.5466		3	PR207 exp vs PR037 uninduced	-0.52982	-0.95952	-0.10013	0.0324342
	1.95421	2.53665	3.41605	2.75601	3.27355	2.57243	1.94627	2.49822	2.50497	3.28731	2.36503	2.54843	2.55876	2.22215	3.82405	2.69474	3.26093	2.97796	2.83399	2.31042	3.70894		4	PR207 exp vs PR188 exp	-0.56447	-0.94622	-0.18271	0.0171492
	3.22743	2.92449	2.19771	3.69809	9.6458	3.16954	1.87952	2.32472	3.14314	2.77917	4.78364	2.66566	2.96321	2.47215	4.17832	2.59026	1.75918	4.07549	3.50115	2.32077	2.75589		5	PR207 exp vs PR284 uninduced	-0.6158	-1.0448	-0.18681	0.0234546
	2.62369	3.47214	3.91633	3.60891	3.67185	3.69075	2.70274	3.79209	2.65498	3.05665	10.9607	3.90958	2.74818	2.85732	3.1927	2.07954	3.35906	2.73681	3.76245	2.71969	2.56465		6	PR207 exp vs PR285 uninduced	-0.65571	-1.08984	-0.22158	0.0213361
	4.15427	2.77281	3.08057	3.43087	2.24157	3.35378	3.46035	2.39589	3.14906	2.49644	3.35	4.41777	3.20314	2.35302	4.70419	2.37996	4.26994	2.65643	2.85104	2.74539	3.26478
	2.50856	2.36295	2.2491	3.09678	8.91338	5.18747	2.24005	2.62859	2.07836	2.40681	2.61874	3.10968	4.20397	2.7746	1.97762	2.98516	2.96187	2.2459	3.24483	2.60438	2.39108
	3.31411	5.12478	4.27896	2.45083	2.75542	2.66146	2.72299	2.81959	2.58172	2.30976	4.52822	2.86422	3.53902	3.97379	2.01513	2.92564	2.16648	2.77326	2.04612	2.24243	2.96158
	2.96861	1.83981	2.51209	3.04214	2.99944	3.3323	2.1744	2.28354	3.09841	2.91154	2.69072	3.43314	2.88229	2.99049	2.09048	2.61695	4.39007	3.62101	2.26303	4.47814	2.37637
	2.44317	2.78814	3.50191	2.67199	6.6597	4.83489	2.31659	2.36576	1.92014	2.49729	4.46404	2.47187	3.15242	4.6068	3.35359	2.46719	2.83662	2.63283	3.39559	3.01673	3.14952
	1.9933	2.38847	3.94726	3.43345	4.98866	2.81873	3.0269	2.39478	3.08406	3.61468	4.23211	4.2574	2.29759	2.66904	3.33148	2.7929	4.48317	2.6968	2.45078	2.50416	2.5117
	3.4864	2.46128	2.42948	3.33188	5.14163	3.10796	4.87044	2.53945	3.20146	5.42704	2.69448	2.33795	2.37707	2.63241	4.52914	4.21368	2.49531	2.40019	2.37829	3.55087	1.77336
	2.98551	3.57629	3.20861	2.8889	2.74786	1.58095	1.99519	2.71902	2.44336	3.25748	4.92043	3.60196	2.51414	3.34622	4.86738	3.28483	2.53068	2.20116	1.95311	4.25868	4.15604
	2.19617	2.59165	2.56186	2.49956	2.35672	2.65108	2.48078	2.1713	3.6161	3.35239	5.15783	4.11309	4.16126	2.42022	2.75389	3.25971	2.0438	2.93804	2.47096	3.0129	3.28144
	3.85567	2.58063	2.55946	2.55133	2.51612	5.42485	2.58613	2.26239	2.29798	3.21294	2.96593	4.71843	2.00025	2.30116	4.06266	2.70764	2.19935	2.9044	2.57213	5.05604	2.88368
	1.90369	3.04163	2.43569	2.11743	3.20919	2.12056	2.45085	2.42902	3.70223	3.22717	5.38039	2.84056	2.48271	3.60918	2.50431	2.35483	2.2637	2.50139	1.56581	2.95539	3.27371
	2.53811	2.99897	3.23434	2.68752	3.5549	3.72086	2.7855	3.09795	3.25747	2.70416	5.6444	4.57393	2.82667	2.49235	2.36251	2.58608	3.00522	3.9535	3.43791	2.28538	2.18871
	2.52374	3.51183	1.89004	3.0534	2.4274	1.89509	2.04585	2.50863	3.29698	3.499	3.58517	3.65119	2.64371	2.2986	4.09616	2.8689	2.86948	4.46089	2.28787	3.07221	2.73421
	2.93909	3.2803	2.12472	2.29919	2.73881	4.64779	3.29549	4.54738	3.36202	2.88679	3.40192	5.49123	4.53773	2.55652	3.08902	3.22252	2.48216	4.13148	2.75843	2.51349	2.10005
	2.41918	2.84781	1.9866	3.14663	2.36816	4.7139	3.06758	2.81484	4.82889	3.18763	5.53426	3.11865	3.19461	2.68668	2.0687	2.18574	3.04428	2.95942	2.67212	1.74035	3.30506
	2.88047	2.92664	1.84907	2.28979	2.64468	5.0225	2.46327	2.19499	2.70946	3.80832	5.31352	2.43681	2.83597	2.39923	2.88675	2.65296	1.90042	2.12833	3.24221	2.64725	2.82568
	4.43257	4.22689	3.54162	3.10795	5.48732	2.70838	3.22097	2.29603	2.52903	2.64374	2.537	4.54995	4.80263	3.88788	3.37823	2.65078	3.0119	4.18724	2.18508	2.69937	2.26266
	3.93599	2.26643	3.1633	7.34715	3.09835	3.25435	2.68603	3.10484	3.42073	3.84127	4.00126	4.86293	4.14759	4.87155	3.34608	3.07332	2.35311	3.28652	2.39629	1.9292	5.75996
	2.56326	2.05915	4.14137	3.73598	2.0488	2.89283	2.36053	2.40103	3.21142	3.29459	3.84722	3.61951	2.24364	2.75521	2.16014	3.14745	1.97935	2.88284	3.5651	2.66554	2.40898
	2.48461	2.44762	2.94016	4.11883	3.17826	4.96076	2.35853	3.63416	2.19906	3.52742	2.5498	2.70809	3.87381	2.1236	2.76035	2.3626	2.07031	2.61596	2.16813	2.75525	2.89847
	4.20922	2.10391	2.41738	3.07486	2.60109	2.49769	3.04837	3.16143	3.07955	4.05848	3.90062	11.8624	2.17593	2.41621	3.21479	2.83838	2.99365	2.24313	2.48877	2.44635	2.95526
	2.57147	4.09212	2.81059	3.62047	2.64999	4.0814	2.83287	2.71625	2.94723	2.65628	5.21605	5.44651	2.85405	2.98077	2.89405	3.46249	2.90051	4.24104	2.57915	3.02806	3.44858
	2.60641	2.71072	2.24632	1.73097	3.06441	3.87091	3.27785	2.43988	2.44638	3.43691	2.12481	5.14888	1.93004	2.51234	1.9402	2.87315	1.86244	2.58294	3.11753	3.33765	2.5349
	3.17392	3.89555	2.0635	3.16899	4.11238	3.20219	2.5106	2.43038	2.30087	2.40209	3.08779	3.19754	3.45556	4.06589	3.2588	2.8682	2.3946	2.77685	2.49216	2.01181	2.81009
	2.11774	2.27719	3.69983	2.67349	3.49564	2.98838	2.02207	2.48359	2.17022	3.14118	3.79207	3.99007	2.52047	3.60801	3.02311	3.02194	2.78744	2.15889	2.31953	2.11311	2.59234
	4.31038	3.20875	2.5342	4.20198	4.00434	4.40877	2.38464	2.55509	2.00699	3.59631	5.2212	3.2715	2.43157	3.04272	2.45114	2.14717	3.06233	2.46054	2.40577	2.14317	2.06264
	2.97472	3.0862	2.47005	3.7249	3.21946	3.86885	2.73798	3.2181	4.06619	4.03454	2.99601	2.35244	3.74654	2.37664	2.74589	2.17147	2.86222	1.98645	4.25287	3.69238	2.37838
	1.96187	3.02561	1.65961	9.39679	8.221	4.12855	2.7085	2.78024	2.73601	2.31932	2.36059	6.37468	2.89245	2.37667	2.88429	2.42227	2.5698	2.95472	2.36043	2.48439	2.27962
	2.82962	4.21064	2.3911	2.93352	3.83386	2.3836	2.47584	3.16009	1.98849	2.1433	3.096	3.66406	2.62653	3.40803	4.14515	2.24086	4.01495	2.94533	3.6228	2.0372	3.0359
	3.92064	3.09075	2.42025	2.33028	3.28164	3.94583	2.50144	2.13146	3.68326	3.00723	2.62311	2.12276	4.20704	1.85219	3.61334	2.44175	2.52749	3.91336	1.97998	2.17734	1.96752
	3.96715	3.21075	2.33301	4.14063	2.58419	3.15251	2.58736	3.53363	1.8394	2.41537	3.92087	2.78365	2.12973	2.96185	3.4771	2.12755	2.48841	2.33078	2.31	2.13667	2.94676

## Sheet: Fig. 4-fig. suppl. 1C
	Ampicillin spot dilution assays uncropped images

## Sheet: Fig. 4-fig. suppl. 2B
	Cell lengths raw data																															Statistics of individual replicates
	Cell length [µm]																															#	Condition	Replicate	n	Mean	SD	SEM	95%CI_lo	95%CI_hi	Median	p(Shapiro-Wilk)
	WT exp			WT stat			PR033 exp			PR033 stat			PR173 exp			PR173 stat			PR188 exp			PR188 stat			PR196 exp			PR196 stat				1	WT exp	1	100	2.83996	0.61797	0.0618	2.71734	2.96258	2.71532	0.021
	Replicate 1	Replicate 2	Replicate 3	Replicate 1	Replicate 2	Replicate 3	Replicate 1	Replicate 2	Replicate 3	Replicate 1	Replicate 2	Replicate 3	Replicate 1	Replicate 2	Replicate 3	Replicate 1	Replicate 2	Replicate 3	Replicate 1	Replicate 2	Replicate 3	Replicate 1	Replicate 2	Replicate 3	Replicate 1	Replicate 2	Replicate 3	Replicate 1	Replicate 2	Replicate 3		2	WT exp	2	100	2.92778	0.6481	0.06481	2.79919	3.05638	2.88194	0.003
	3.0329	2.32034	3.10668	3.21567	2.19654	1.93968	2.66389	4.36608	3.67125	4.12565	2.06549	9.27257	2.59862	3.1812	3.82177	3.5059	2.36276	5.12275	1.96707	2.28648	2.95272	2.30463	4.31008	1.861	2.06554	3.44644	4.58064	2.52811	3.60495	2.36348		3	WT exp	3	100	2.65489	0.58589	0.05859	2.53864	2.77115	2.52771	0
	3.42833	2.24793	2.16504	1.99813	2.30256	2.52182	2.59877	2.41593	3.29256	2.16035	2.22693	2.48312	3.3582	3.04059	2.20843	3.36669	3.81226	2.22887	2.56775	1.87496	3.44298	5.51595	2.58061	3.66802	2.01733	2.56964	2.20453	2.84528	2.70259	2.07537		4	WT stat	1	100	2.73462	0.64355	0.06435	2.60693	2.86232	2.61673	0
	3.13386	2.4717	3.77922	2.59005	2.85136	2.53053	6.18583	3.62408	4.52427	3.74644	3.32792	4.67698	2.84453	2.95721	2.31483	2.43935	3.02621	4.2173	3.29084	1.9896	1.98936	2.20928	2.69435	3.9064	3.13877	4.23561	2.29212	3.34641	2.583	1.68349		5	WT stat	2	100	2.62097	0.52516	0.05252	2.51677	2.72518	2.47115	0
	2.53939	1.80939	2.27	2.17204	2.46373	2.05833	5.90979	3.62877	3.25696	1.8524	4.00037	6.32277	3.60112	2.26884	4.08033	3.14917	2.37221	8.05916	3.15857	1.70383	3.41845	2.97344	4.07153	1.80332	2.56165	2.35705	2.75571	2.24704	2.86226	2.83936		6	WT stat	3	100	2.62064	0.50238	0.05024	2.52096	2.72033	2.59468	0.001
	2.46091	2.43106	2.99368	2.13751	2.45994	3.07741	3.47052	3.4297	3.61639	5.8974	2.63381	3.52695	5.09224	3.35767	2.41662	2.50582	5.0287	2.88391	4.32046	2.62905	2.5728	2.07824	2.58058	2.45705	3.46498	2.87598	2.41556	3.16334	4.176	1.8238		7	PR033 exp	1	100	3.56403	1.31691	0.13169	3.30273	3.82534	3.24779	0
	3.30799	2.17277	2.55265	2.13125	3.16899	3.201	2.9782	2.50875	5.2345	3.73459	3.02377	4.27825	2.26359	4.24901	2.36365	2.81596	34.0883	3.05393	2.36258	2.5487	2.56472	3.33401	3.41767	2.36689	2.89803	3.64217	2.37589	1.75405	2.06576	2.70557		8	PR033 exp	2	100	3.80326	1.35895	0.13589	3.53361	4.0729	3.41581	0
	2.83107	2.55755	2.64287	3.11257	1.84582	1.85485	5.0326	3.98369	4.09093	3.67524	2.99469	6.88214	2.94345	3.37635	2.4897	2.79684	6.97658	3.63789	3.41305	2.7631	2.9724	2.68185	2.39342	1.73589	3.32429	2.86234	2.08536	2.64614	3.16206	2.54628		9	PR033 exp	3	100	3.72697	1.21804	0.1218	3.48528	3.96865	3.53678	0
	3.14881	2.03139	2.6287	1.96524	3.26689	2.42705	2.78679	2.75807	5.05998	4.01601	5.12652	10.6727	3.16229	8.20307	2.27286	2.32601	2.30543	2.36402	3.7529	3.40711	4.70653	1.97214	2.3743	2.08758	3.87154	2.31519	3.19246	1.80247	2.66969	2.18568		10	PR033 stat	1	100	3.47852	1.37233	0.13723	3.20622	3.75082	2.96099	0
	2.60557	2.37909	2.04803	3.38628	2.18479	2.34967	2.8074	2.49222	3.84263	2.28695	2.57494	2.64085	3.58864	3.46739	2.37478	3.38639	2.59917	4.34522	2.26491	3.11123	4.63026	2.95774	2.57138	2.54827	2.83852	2.72598	2.25047	2.35132	1.9079	3.24578		11	PR033 stat	2	100	4.13165	2.18895	0.2189	3.69732	4.56599	3.73919	0
	3.22273	3.86737	2.5947	2.37752	2.67374	2.02613	4.06782	3.56465	3.14718	4.8981	4.96949	2.55789	2.28535	2.63171	4.19048	3.00793	4.07577	4.12991	3.21156	2.32429	2.65929	3.87039	2.08138	2.96778	3.45314	3.34602	2.81532	2.66215	2.61348	3.46552		12	PR033 stat	3	100	3.99259	2.11434	0.21143	3.57306	4.41212	3.28917	0
	1.90721	2.44872	2.80832	3.4563	3.58568	2.56749	4.63941	5.3653	3.64987	2.04588	5.0814	3.24431	4.21077	2.95896	2.71488	2.69021	2.83548	3.11011	2.96241	2.32025	2.49398	4.31046	1.36917	3.09751	3.62539	2.52517	3.05202	2.18089	3.53592	3.44967		13	PR173 exp	1	100	3.77636	2.32484	0.23248	3.31506	4.23766	3.23401	0
	2.65283	3.27573	2.12833	2.82154	2.96719	2.18164	2.40923	2.95751	3.0696	2.56939	4.07824	4.66332	3.38727	2.39805	2.52869	2.75733	2.71439	3.0876	2.19187	2.73047	2.63177	3.08955	4.76423	2.77211	3.28112	2.53276	5.0226	2.63115	2.94416	2.09997		14	PR173 exp	2	100	3.39964	1.3719	0.13719	3.12743	3.67186	3.06175	0
	1.9439	3.17935	2.13615	2.20934	2.25332	3.18313	2.26156	3.86053	3.87255	2.45231	4.76701	7.444	2.49224	6.25976	3.69071	8.10147	2.96864	2.70366	2.74035	4.79094	2.95895	2.11473	3.51926	3.22914	3.0522	3.41852	2.96745	2.69064	3.77915	4.77987		15	PR173 exp	3	100	3.3747	1.24973	0.12497	3.12673	3.62267	3.08353	0
	2.72076	2.7389	2.19832	1.87463	3.36731	2.27457	3.13714	3.54094	4.30262	2.18191	2.29045	3.59007	2.49385	3.54764	2.13009	2.59394	2.38991	2.43793	2.34168	2.70087	2.2974	2.68883	4.24807	2.66057	2.50828	3.29005	2.62295	3.79703	5.34559	1.77639		16	PR173 stat	1	100	3.79452	2.97744	0.29774	3.20373	4.3853	3.14388	0
	2.29463	2.53313	2.45348	2.71733	2.2842	2.60246	3.32201	3.14595	3.43675	3.04341	4.96965	2.50585	2.6152	3.1399	6.6211	3.6172	3.85877	3.82099	2.34201	2.90725	2.65873	3.04998	2.94314	3.59702	3.15015	3.67884	2.45309	2.90518	2.39334	2.50277		17	PR173 stat	2	100	4.0086	3.48209	0.34821	3.31768	4.69952	3.11156	0
	2.26482	2.87048	2.98509	2.92747	2.75692	2.90476	3.92997	3.1178	2.96327	3.29395	4.3419	5.44128	3.21935	3.17668	2.72422	2.60868	3.46139	3.20736	3.22267	2.29837	2.55267	2.16371	2.54964	4.38357	3.03628	2.35491	3.16789	2.15765	1.60289	2.16323		18	PR173 stat	3	100	3.482	1.14046	0.11405	3.25571	3.7083	3.22437	0
	3.46481	2.89257	2.22605	3.0855	2.46916	2.78736	3.09862	4.98547	3.2389	2.24164	3.75985	4.43449	3.52022	2.42112	3.78769	2.67824	4.9855	3.42484	2.49856	3.02695	2.40724	2.57453	4.76265	2.96901	2.05345	2.7967	2.88866	2.64243	2.49966	2.5843		19	PR188 exp	1	100	2.83916	0.77176	0.07718	2.68603	2.99229	2.65187	0
	3.28498	3.23331	2.35672	2.39091	2.06389	2.22204	3.17205	2.81542	3.22685	3.41362	8.09055	2.3517	3.09361	3.04406	2.49618	5.17335	6.07031	5.02336	7.78668	2.28422	3.0362	2.12575	2.16113	3.68881	2.15899	2.75479	2.9073	2.5538	2.63156	2.34164		20	PR188 exp	2	100	2.82612	0.75826	0.07583	2.67567	2.97657	2.64571	0
	3.16123	2.34315	1.9749	1.81182	3.59024	2.90213	4.84331	2.91774	4.23468	2.76652	2.36015	2.49179	3.44353	2.69201	2.65501	2.59221	8.76395	2.25768	2.02855	2.34519	2.55638	2.50042	2.4434	2.50312	1.96415	2.8009	2.72728	2.89104	2.52663	1.76868		21	PR188 exp	3	100	3.02412	0.7384	0.07384	2.8776	3.17063	2.77933	0
	3.26706	3.69073	2.36244	2.56953	2.26965	2.78907	3.22878	2.6782	3.9627	3.4053	3.86203	3.74772	3.6474	2.79234	2.44166	3.57343	2.81791	3.2667	4.00828	3.1794	3.19669	2.38538	3.22312	3.69371	2.48563	2.37175	3.03259	3.6817	3.75883	2.71071		22	PR188 stat	1	100	2.89504	0.93899	0.0939	2.70872	3.08135	2.68534	0
	3.21772	4.00769	2.64867	3.50002	3.15888	2.48502	2.90785	3.80373	4.12004	6.60121	2.18718	5.80421	4.16295	2.80967	3.13867	3.0479	3.10374	3.49272	2.20882	3.11939	3.17973	1.79969	2.24353	2.91363	2.51232	2.77613	2.22913	2.84543	7.98388	2.20214		23	PR188 stat	2	100	2.95649	1.25337	0.12534	2.7078	3.20519	2.68422	0
	3.53658	2.89719	3.0252	2.96383	2.45644	3.66965	3.50078	4.40564	2.65368	2.50277	2.09691	2.83793	1.99043	2.46044	2.78303	3.28127	2.16897	3.49259	2.62936	3.4517	4.27961	3.27056	2.81572	2.13132	9.55903	2.19953	7.44335	2.3172	5.04003	1.66163		24	PR188 stat	3	100	2.96614	0.87639	0.08764	2.79224	3.14004	2.90374	0
	3.58892	3.16494	1.92809	2.55591	2.37082	2.96005	8.95466	2.65662	4.58175	2.56662	2.27059	2.94552	4.31919	2.83413	3.16212	2.68742	3.72709	2.4252	3.36749	2.81295	2.4824	1.99791	1.94474	2.29731	3.2663	2.63873	4.03003	2.22647	3.01055	1.82718		25	PR196 exp	1	100	2.96463	1.09058	0.10906	2.74823	3.18102	2.84552	0
	2.80579	3.86887	3.04134	2.6868	3.70156	2.93355	3.9301	3.07226	4.00987	3.83248	5.43074	2.77768	2.67577	2.87417	2.72765	4.89475	2.17092	3.41326	2.90538	2.54402	2.7349	2.57137	1.90164	2.68125	2.49465	3.331	3.00258	2.63986	2.51226	6.22912		26	PR196 exp	2	100	3.0088	0.61476	0.06148	2.88682	3.13078	2.8829	0.062
	2.55714	3.29289	4.13247	2.49904	2.17049	1.87633	3.38248	3.13886	3.46031	2.24121	6.72165	3.48456	6.48396	2.3672	4.27883	4.82496	3.4058	2.52412	2.07721	4.11398	3.19378	2.55447	2.08651	2.31569	2.98933	2.99255	2.83012	2.53954	3.92835	8.33788		27	PR196 exp	3	100	2.77026	0.7435	0.07435	2.62273	2.91779	2.67161	0
	3.07247	2.52079	3.50384	2.58466	3.06951	3.27883	2.56673	2.47933	5.886	2.68362	4.55948	2.10291	3.15109	3.77456	2.62399	2.92847	2.81486	2.36781	3.68122	2.82341	5.15717	3.47066	3.79599	4.32205	3.81178	3.59841	1.97774	3.13108	2.88389	3.07323		28	PR196 stat	1	100	2.79969	0.95576	0.09558	2.61005	2.98934	2.61461	0
	2.50484	3.80636	2.1412	3.23185	2.65455	1.76056	2.96622	4.53883	3.76498	4.37676	3.13758	3.03133	2.55213	2.51096	3.02241	2.4444	2.6723	3.85924	3.25939	2.39357	2.51347	3.11719	1.73418	3.32063	2.38554	2.66823	2.80496	2.64246	2.76572	2.63756		29	PR196 stat	2	100	2.8677	0.94045	0.09405	2.68109	3.0543	2.67045	0
	2.70357	2.99904	2.15185	2.70306	2.16959	1.80556	2.38665	3.19626	4.21452	2.84697	2.10521	5.22688	3.73844	3.23029	2.6665	3.13858	3.29011	3.97608	2.50583	2.4997	2.55061	1.74712	3.63464	4.747	2.83914	2.36743	2.8079	3.2679	2.03016	2.75061		30	PR196 stat	3	100	2.80327	1.195	0.1195	2.56616	3.04039	2.55338	0
	2.95063	2.8713	2.80374	2.37032	2.06291	3.31646	3.48942	5.02169	3.59916	3.04145	4.84132	2.09615	2.99461	2.35446	2.71981	2.58117	2.97619	4.71443	2.92732	2.50482	4.67644	3.4572	3.08586	1.70122	2.87018	2.50536	2.95684	2.31659	1.85342	2.06224
	2.18616	2.11511	2.82121	2.0473	2.02079	2.26968	3.233	4.51626	2.83553	1.84604	6.47364	1.81346	2.99059	2.98748	3.12165	3.83334	5.55152	5.05061	2.70154	4.06602	2.31822	4.94251	2.59303	1.88976	3.03186	3.10808	2.50141	2.4405	3.0274	1.86206
	2.70988	3.53301	1.99872	2.49327	2.52	2.74788	2.78698	3.5302	3.7282	4.14948	3.95513	4.22999	8.53723	3.23345	4.65868	5.17274	3.04877	2.70364	3.21338	2.49257	2.7818	4.60481	2.70265	3.17474	2.73791	2.437	2.19362	1.92738	2.88178	2.11759		Statistics of conditions
	2.06911	2.62594	3.52306	2.53347	2.2197	2.37864	3.62079	3.95554	3.48873	2.29487	2.292	2.18416	2.4117	4.30855	2.27566	3.38556	2.64349	3.52004	4.40202	2.06629	2.252	2.37899	3.98523	4.30681	3.09344	2.53027	3.03454	1.85021	2.75493	2.48564
	1.86623	2.07296	2.68468	2.52946	2.81859	4.31734	3.15635	3.89247	4.23151	2.35305	2.29674	2.36217	2.41028	3.01112	3.944	3.17359	3.76193	5.61881	1.88091	2.80457	2.89139	3.48836	2.25205	3.76573	2.68402	3.3572	3.43965	1.78646	3.41866	4.06642		#	Condition	n	Mean	SD	SEM	95%CI_lo	95%CI_hi
	2.70689	2.97685	2.50588	3.08142	2.39171	2.69625	2.55176	2.67461	3.56418	2.44664	3.74401	3.49818	4.60316	2.74434	4.53527	3.44668	8.49648	2.43298	3.39786	2.05828	2.54762	2.64154	2.74488	2.6349	3.44302	2.88982	3.60304	2.25496	2.69313	3.21316		1	WT exp	3	2.80755	0.1393	0.08043	2.4615	3.15359
	3.80719	3.26643	2.65191	2.11004	2.09823	2.59882	3.23811	3.21203	2.66617	2.44631	11.3581	4.1585	2.90452	2.61891	3.19931	2.41886	2.76377	3.09215	2.28107	2.4772	2.3906	2.25674	2.04214	2.69126	2.34876	3.25677	3.10797	3.31774	3.3705	1.64841		2	WT stat	3	2.65875	0.06571	0.03794	2.49551	2.82198
	2.94403	2.11047	2.13123	2.13855	2.88917	2.95972	3.79467	3.93645	3.01066	2.75282	4.16688	16.1338	5.3856	3.00667	2.92939	3.39471	3.11938	2.353	2.39626	2.78905	3.30172	2.18813	2.53228	2.97695	1.9927	2.43916	2.38385	2.29638	2.02877	2.68089		3	PR033 exp	3	3.69809	0.1222	0.07055	3.39452	4.00165
	2.48889	2.93255	2.30725	2.98403	2.53102	2.63245	2.77648	5.55498	3.06216	6.27014	5.99725	2.6308	6.25578	3.35905	4.64755	5.39548	3.99244	3.65356	3.65303	4.72466	2.77019	1.5127	2.81912	1.64703	3.26189	3.00641	2.31811	2.30799	2.65123	1.91101		4	PR033 stat	3	3.86759	0.34404	0.19863	3.01294	4.72224
	2.56564	2.49292	3.52309	2.84868	2.11366	2.45029	4.19083	2.9883	7.10905	3.91838	6.05803	6.06159	3.85811	4.15658	2.54877	2.68974	3.41587	3.01167	3.33606	2.30143	3.28925	2.59182	3.81389	3.65713	3.06725	1.8334	2.38615	1.73523	3.445	3.10397		5	PR173 exp	3	3.5169	0.22505	0.12993	2.95786	4.07594
	2.15682	2.47402	2.5764	2.5177	2.56155	2.29317	3.42341	2.9754	3.36356	2.80704	4.62821	2.76939	3.66427	2.70986	2.52628	3.42911	2.91472	2.37268	2.29889	3.52565	2.94195	4.57094	3.88965	1.73516	2.76411	2.97626	2.22726	2.39822	3.0234	2.62513		6	PR173 stat	3	3.76171	0.26483	0.1529	3.10384	4.41958
	2.10548	2.11223	2.84175	2.0564	2.61755	2.0091	3.74091	3.4727	3.69166	2.75072	8.43421	2.15342	3.40987	3.09168	4.23261	4.04802	5.0789	1.99328	2.10402	3.10594	3.75554	2.09817	3.0688	3.29338	4.5074	3.47566	2.77298	2.25863	2.48609	2.15901		7	PR188 exp	3	2.89647	0.11074	0.06394	2.62137	3.17156
	2.056	2.61903	3.21771	2.66313	2.75269	2.0918	3.87091	2.83722	5.69237	2.56111	2.46223	2.46168	3.48055	2.33085	3.90302	2.46852	3.02792	2.89896	2.42845	4.51523	2.61325	3.30012	4.04061	6.33733	2.82411	4.42099	2.55715	2.90801	2.53029	2.56049		8	PR188 stat	3	2.93922	0.03857	0.02227	2.84341	3.03504
	3.6936	2.6423	2.47308	1.97172	2.51612	2.57327	3.15756	4.61902	3.71134	5.75117	6.01745	2.49387	4.01718	2.35199	2.10424	2.46489	6.01802	4.4702	2.73298	2.99243	2.68148	3.49166	1.66027	2.56871	3.09986	2.16253	2.65897	4.12974	2.74704	2.1256		9	PR196 exp	3	2.91456	0.12691	0.07327	2.59931	3.22982
	2.84961	2.90466	2.40235	2.17057	2.59187	3.66179	4.92016	2.77368	3.30409	4.24114	3.3206	4.55972	13.8912	4.36324	2.66327	3.10123	2.90574	2.37855	2.54817	3.38197	2.65193	2.77866	2.15608	1.83866	2.56653	4.41449	2.05076	1.7751	1.90291	2.62719		10	PR196 stat	3	2.82355	0.03827	0.0221	2.72849	2.91862
	3.25045	4.87257	1.94158	2.92068	3.51525	2.74657	3.45734	2.72267	3.02706	2.89376	2.77178	3.0578	4.59243	2.64523	2.29353	3.42	3.25401	2.25508	2.86491	2.41782	2.96129	2.07835	1.85208	3.68525	3.78178	1.84241	2.09329	2.36037	2.23798	2.13798
	2.44843	2.47566	2.51434	2.49923	2.561	2.39728	2.82328	2.45277	3.50937	7.28923	4.17182	2.5149	2.12997	4.61274	9.65016	2.62472	2.76407	3.16772	2.47625	2.11113	3.73097	2.42136	3.3653	5.00527	2.32912	2.7829	2.74544	2.61633	3.22847	2.49528
	3.03681	3.01892	1.99181	2.8771	2.44403	2.09936	3.09378	3.07835	4.13117	2.69198	3.69068	2.9241	3.04617	3.49249	4.06801	2.96387	2.99215	6.32129	3.01344	2.58307	2.46196	3.92692	3.08231	2.65851	2.72161	4.06728	2.12354	5.87767	2.62868	3.45119		Statistics of comparison of means between conditions
	2.17257	3.68874	2.62713	2.88572	2.18213	2.52344	2.39027	3.20367	2.67582	2.46483	3.62066	5.66751	3.47263	3.1271	2.61693	2.4882	2.31433	2.83718	2.45174	2.52179	3.75569	1.8927	3.47355	4.22881	3.24022	2.81672	3.19735	1.94572	2.52316	2.21643
	2.25868	3.48072	2.94231	1.98479	4.61432	2.34994	3.00589	3.23283	2.77933	2.95563	9.17976	7.17379	4.25202	2.7002	2.69191	4.54959	8.90195	2.10233	4.52902	4.79985	3.2975	1.90132	1.7115	2.69408	3.29876	3.70585	3.15355	2.42884	3.23707	1.75103		#	Condition	Difference	95%CI_lo	95%CI_hi	p value
	3.62583	2.32575	3.27278	3.26732	2.42094	2.6924	4.0761	5.87218	2.8973	3.33919	7.12153	2.68104	2.63684	2.54558	3.81613	2.3896	2.76136	2.69241	2.51448	5.54373	2.70154	2.38554	3.44898	3.6849	2.09024	3.20289	2.61973	2.68046	2.02207	2.62168		1	WT exp vs WT stat	-0.1488	-0.44053	0.14294	0.197694
	2.76511	2.78909	1.93005	2.08586	2.32823	2.6412	11.7578	4.93609	3.01626	3.81705	2.88829	6.61447	3.18118	2.70006	5.28015	4.59753	8.15906	5.49814	2.19495	2.16694	2.61879	3.25593	3.30622	3.46002	3.04522	3.52746	2.19626	2.82047	2.36256	2.02435		2	WT exp vs PR033 exp	0.89054	0.5915	1.18958	0.0012239
	3.85897	1.88291	2.52121	2.39546	2.64092	2.13806	3.41964	4.2834	2.85344	2.40358	3.9202	2.09248	3.75985	3.00649	2.61178	4.94319	3.6585	3.73502	2.42949	1.76331	2.91277	2.32913	2.29493	2.06083	3.09004	3.26607	2.76268	2.94518	3.37368	2.51641		3	WT exp vs PR033 stat	1.06004	0.32204	1.79805	0.0213162
	2.38344	3.90718	2.49329	2.80324	2.03589	3.23557	3.81232	2.63892	3.95476	6.72718	4.77138	2.8166	2.62183	3.41468	4.02894	3.01289	2.9102	2.39691	2.49178	3.9747	2.69332	2.02811	2.12945	3.17359	2.44129	2.31615	2.04655	2.41984	4.66689	4.18934		4	WT exp vs PR173 exp	0.70936	0.24965	1.16906	0.0148465
	2.68715	2.84411	2.23456	3.00476	2.33336	2.23577	5.82652	2.84316	3.20257	2.48283	2.03458	5.08341	3.80892	3.20165	3.36942	3.007	11.6584	3.30018	1.73852	2.91531	4.25425	5.4323	1.6647	1.60607	2.31006	3.87557	2.27588	2.24502	2.22644	2.27803		5	WT exp vs PR173 stat	0.95416	0.40723	1.50109	0.0114089
	2.07707	3.36383	2.6036	2.45034	2.44436	3.47487	3.74768	4.47268	3.43572	4.32266	6.84184	2.45639	3.29207	2.83177	3.55514	5.65647	6.08336	4.88023	2.63712	2.62709	3.68239	3.27355	1.99298	2.89385	2.37466	2.68424	1.8581	2.35716	5.85157	2.29917		6	WT exp vs PR188 exp	0.08892	-0.20216	0.38	0.437919
	2.12027	3.96163	2.46102	3.77943	2.46093	2.69715	5.21123	2.87126	3.10346	2.29416	4.72225	6.25817	4.34166	3.23781	2.47387	7.83179	4.35687	3.43727	4.02292	1.98163	4.14851	2.55327	11.3747	2.29863	3.04901	2.9343	2.9098	2.08075	4.13057	2.51317		7	WT exp vs PR188 stat	0.13168	-0.18551	0.44886	0.238935
	2.67004	2.91042	2.53711	2.51924	2.36333	2.11879	2.48111	5.47654	3.76884	2.95198	1.79037	3.76087	3.74055	2.86105	3.17193	11.32	2.50213	2.62357	3.92642	2.43158	2.42796	2.45773	6.54401	2.25978	2.50914	3.10921	1.68681	3.02562	2.299	3.18018		8	WT exp vs PR196 exp	0.10702	-0.19608	0.41012	0.381423
	3.1172	2.93564	1.7849	2.69416	2.08019	2.05175	3.75217	3.14878	3.81568	3.67735	1.89641	3.92576	2.6279	2.95409	3.5967	3.85655	4.28371	2.51894	2.41253	1.921	2.62403	2.31718	2.62978	3.86898	2.53016	3.32604	2.85106	2.50353	2.72122	1.91824		9	WT exp vs PR196 stat	0.01601	-0.30151	0.33353	0.863433
	2.3588	3.01669	2.4523	3.33404	2.43628	2.45558	4.80342	3.20787	2.5549	2.65552	4.20222	3.06977	10.8992	2.79813	3.45066	29.6183	4.62761	5.24906	1.87994	2.31966	2.22898	3.36062	2.26208	2.36066	2.50488	4.654	2.7631	3.34956	2.94244	4.0805
	1.73018	2.13296	2.78687	2.01703	2.18484	1.9895	4.16827	6.6963	3.2478	3.26269	3.42409	2.33051	5.15518	4.88045	2.64192	2.78626	3.3543	2.7644	2.93517	2.86174	2.75861	2.20786	4.38841	2.58348	3.29511	2.65307	2.32032	2.71671	2.27388	2.92347		#	Condition	Difference	95%CI_lo	95%CI_hi	p value
	3.20955	2.5336	2.23604	4.08952	3.04195	2.84206	3.54366	6.19831	3.16295	2.33342	9.50781	3.29087	3.14445	3.03581	2.31143	3.382	3.93423	2.98587	3.20568	2.42648	3.5952	2.91236	1.95762	3.27084	2.91702	2.49938	2.42531	2.52338	2.58846	8.5072		1	WT stat vs WT exp	0.1488	-0.14294	0.44053	0.197694
	2.49443	2.7277	2.66156	2.65557	2.71942	2.59054	3.08705	2.15251	3.1747	2.81322	4.30898	2.38405	18.5935	3.41275	3.12044	2.40248	8.79528	3.03083	2.29607	2.47538	2.96241	3.02714	1.76901	2.52483	2.94396	3.78475	2.71626	2.82326	2.78866	2.58177		2	WT stat vs PR033 exp	1.03934	0.78755	1.29113	0.00088374
	2.36614	2.95599	2.62877	2.54217	2.15287	2.29762	3.91847	3.20227	3.07801	4.22781	2.71738	2.52567	2.36723	4.4597	4.5164	3.1245	3.7395	2.90048	2.41447	3.58633	2.78848	2.4417	2.92826	2.32722	2.54667	3.36262	2.49972	2.13407	2.89186	3.63802		3	WT stat vs PR033 stat	1.20884	0.39298	2.0247	0.0226938
	3.07798	2.58295	4.16448	2.55433	2.49504	2.03252	2.97303	8.11038	3.10573	3.61632	8.08002	8.16621	2.8869	2.57173	2.513	3.54836	2.77614	3.48217	3.26111	3.24285	2.1433	3.46511	1.83629	3.27876	3.0504	2.72358	2.32229	2.32282	2.57512	2.81575		4	WT stat vs PR173 exp	0.85815	0.34955	1.36676	0.0160604
	3.0852	3.50453	2.50601	2.52342	2.98598	2.60855	5.43705	3.26494	4.07387	2.55029	2.49547	3.08116	4.90385	3.79247	2.60918	2.24805	2.77958	4.15733	2.30155	3.32552	3.86134	3.41333	2.41231	2.94135	1.95998	3.71048	2.22546	3.3658	1.68817	2.1087		5	WT stat vs PR173 stat	1.10296	0.49139	1.71452	0.0144283
	3.83188	3.33646	1.9721	1.85507	2.42085	2.74571	2.84447	6.36727	3.6797	4.7084	1.97776	4.20151	3.67086	2.78065	2.57602	4.96194	2.43025	2.44202	3.20074	2.96542	5.75323	2.53601	2.32853	3.23564	1.76965	3.70823	3.08499	2.92125	3.36409	1.4948		6	WT stat vs PR188 exp	0.23772	0.0112	0.46424	0.0441396
	2.57774	3.78856	2.56733	3.48789	2.65162	2.79849	5.2417	2.61792	2.48784	2.44039	2.36175	5.16467	2.96828	4.45116	2.3565	2.42727	2.88664	3.92144	2.62972	2.66237	2.83267	3.72705	3.42371	3.3226	2.84903	2.47319	2.62148	1.93241	3.70832	3.62768		7	WT stat vs PR188 stat	0.28048	0.14599	0.41496	0.0062186
	1.95421	2.53665	3.41605	3.41494	2.95238	3.60939	3.28731	2.36503	2.54843	6.60595	3.47303	3.21424	10.9077	3.20057	2.54218	3.17437	3.14942	2.4473	2.69474	3.26093	2.97796	6.08411	4.11189	2.42016	2.76234	4.29092	2.27059	2.4329	2.45976	2.70484		8	WT stat vs PR196 exp	0.25582	-0.00674	0.51837	0.0532634
	3.22743	2.92449	2.19771	2.58526	2.49909	2.96692	2.77917	4.78364	2.66566	2.51614	2.26777	1.69096	3.25571	3.23264	2.44841	2.95437	2.41848	2.44112	2.59026	1.75918	4.07549	2.20024	2.82647	2.92499	2.88518	2.85319	3.48887	2.27082	2.23204	2.69842		9	WT stat vs PR196 stat	0.16481	0.03026	0.29935	0.0292696
	2.62369	3.47214	3.91633	2.62522	2.31264	2.48974	3.05665	10.9607	3.90958	2.74854	3.69199	7.0967	3.28651	2.79497	4.72588	4.33274	2.2186	4.01164	2.07954	3.35906	2.73681	1.77627	2.32981	1.57392	2.77727	3.39992	2.62478	2.51063	3.18802	2.74403
	4.15427	2.77281	3.08057	2.27351	3.30368	2.83177	2.49644	3.35	4.41777	4.01508	3.50564	3.46466	2.74355	3.83874	2.74984	3.42561	2.76576	5.12195	2.37996	4.26994	2.65643	2.26288	2.954	6.16385	3.04483	2.51312	2.97404	3.02747	1.89268	1.82097		#	Condition	Difference	95%CI_lo	95%CI_hi	p value
	2.50856	2.36295	2.2491	2.06911	4.56542	4.37891	2.40681	2.61874	3.10968	5.55779	2.0719	2.93793	3.14746	4.82114	4.70073	2.29204	4.0824	4.5912	2.98516	2.96187	2.2459	2.64551	2.09881	3.11427	2.16322	2.46244	4.33288	2.85065	2.45497	3.23522		1	PR033 exp vs WT exp	-0.89054	-1.18958	-0.5915	0.0012239
	3.31411	5.12478	4.27896	1.91352	3.33229	2.39934	2.30976	4.52822	2.86422	2.59824	3.99297	4.7233	3.33802	3.21535	2.74658	3.08539	4.45519	2.4068	2.92564	2.16648	2.77326	3.4508	4.06281	4.00775	3.39958	2.79008	2.81978	3.50683	2.42481	2.00647		2	PR033 exp vs WT stat	-1.03934	-1.29113	-0.78755	0.00088374
	2.96861	1.83981	2.51209	3.3042	2.15247	2.90794	2.91154	2.69072	3.43314	4.36294	3.32005	3.7554	2.70954	3.71823	2.23154	2.62941	3.35465	4.51608	2.61695	4.39007	3.62101	2.1437	2.89224	3.2759	3.21951	2.48542	2.85327	2.1448	2.57299	1.91337		3	PR033 exp vs PR033 stat	0.1695	-0.58471	0.92372	0.490757
	2.44317	2.78814	3.50191	2.81294	2.69846	3.41944	2.49729	4.46404	2.47187	3.41083	2.24286	2.52062	3.45902	3.07944	2.51421	2.42325	5.20414	3.15736	2.46719	2.83662	2.63283	2.76123	2.67374	1.98578	2.71276	3.03299	3.32157	3.03848	3.2678	3.71317		4	PR033 exp vs PR173 exp	-0.18118	-0.64445	0.28208	0.305655
	1.9933	2.38847	3.94726	1.89535	2.37188	2.61115	3.61468	4.23211	4.2574	6.17742	2.24157	5.95213	3.24867	3.21552	4.15121	6.57859	3.35802	3.14131	2.7929	4.48317	2.6968	2.15715	3.23696	2.13821	2.34671	2.53999	2.17775	3.67082	2.64779	1.99771		5	PR033 exp vs PR173 stat	0.06362	-0.49279	0.62003	0.732242
	3.4864	2.46128	2.42948	2.81702	2.95926	2.61221	5.42704	2.69448	2.33795	2.96636	8.44662	4.54317	2.68364	5.72937	8.27164	3.28209	3.98698	2.39307	4.21368	2.49531	2.40019	2.31429	2.48528	2.45875	2.96201	3.61371	3.04698	2.45339	2.58084	2.79888		6	PR033 exp vs PR188 exp	-0.80162	-1.06698	-0.53626	0.00113625
	2.98551	3.57629	3.20861	3.15288	3.68332	2.38118	3.25748	4.92043	3.60196	2.87139	2.8049	4.81227	2.24849	3.23754	2.81755	2.17957	2.38396	3.07854	3.28483	2.53068	2.20116	2.83286	2.1328	1.92772	2.8134	3.5719	2.83262	2.45621	2.65327	3.46005		7	PR033 exp vs PR188 stat	-0.75886	-1.03185	-0.48588	0.00492174
	2.19617	2.59165	2.56186	5.7042	2.72377	2.09715	3.35239	5.15783	4.11309	3.09219	3.84439	4.72794	3.29261	2.79687	2.76303	3.78416	2.11886	3.5881	3.25971	2.0438	2.93804	2.97162	3.81443	3.35031	3.0142	2.57432	2.5833	2.15143	2.01622	2.75629		8	PR033 exp vs PR196 exp	-0.78352	-1.06609	-0.50096	0.00153717
	3.85567	2.58063	2.55946	3.03014	2.59482	2.63794	3.21294	2.96593	4.71843	2.84118	2.72275	2.76785	4.1237	2.89624	4.44432	2.56123	2.30946	3.77096	2.70764	2.19935	2.9044	1.74334	2.79843	2.08203	3.25399	3.65326	2.21367	2.99803	2.81418	2.43682		9	PR033 exp vs PR196 stat	-0.87453	-1.14784	-0.60122	0.00355265
	1.90369	3.04163	2.43569	4.6879	2.23352	2.44492	3.22717	5.38039	2.84056	2.17626	3.94813	2.46912	3.67026	2.66921	3.21372	2.67551	2.61017	3.2944	2.35483	2.2637	2.50139	4.59398	2.22818	2.07161	2.44904	3.53715	2.35464	4.32422	2.6712	2.8818
	2.53811	2.99897	3.23434	4.21784	2.40376	1.92722	2.70416	5.6444	4.57393	2.63388	2.44921	2.56691	3.29651	2.71922	3.05352	7.50718	3.28585	2.62865	2.58608	3.00522	3.9535	2.78574	1.93619	3.27876	3.44648	2.70117	2.52912	2.84781	2.1007	2.42548		#	Condition	Difference	95%CI_lo	95%CI_hi	p value
	2.52374	3.51183	1.89004	2.37912	2.61171	2.22949	3.499	3.58517	3.65119	3.12065	2.32244	2.64297	2.56606	2.30566	3.32951	2.54753	3.1684	2.29198	2.8689	2.86948	4.46089	3.11147	2.67409	2.87678	2.99927	2.22051	2.5135	2.57243	1.85984	2.62867		1	PR173 exp vs WT exp	-0.70936	-1.16906	-0.24965	0.0148465
	2.93909	3.2803	2.12472	2.36083	2.14287	2.63574	2.88679	3.40192	5.49123	3.08487	2.79137	2.26572	4.95273	5.11947	3.11512	3.15392	2.87877	7.97635	3.22252	2.48216	4.13148	1.8313	3.36038	2.72953	3.59083	1.74405	2.68425	2.55155	3.02633	1.76626		2	PR173 exp vs WT stat	-0.85815	-1.36676	-0.34955	0.0160604
	2.41918	2.84781	1.9866	3.34059	2.14378	3.29571	3.18763	5.53426	3.11865	2.62599	3.88607	3.72197	3.04822	4.13079	5.32648	4.11789	3.47242	3.43867	2.18574	3.04428	2.95942	2.82892	2.44618	1.84987	2.01168	2.85369	3.03692	2.4871	2.96001	2.26103		3	PR173 exp vsPR033 exp	0.18118	-0.28208	0.64445	0.305655
	2.88047	2.92664	1.84907	3.40469	2.47315	2.97365	3.80832	5.31352	2.43681	2.30991	2.03456	3.62823	2.39359	5.62889	2.86792	4.1684	2.99188	3.60803	2.65296	1.90042	2.12833	1.66699	2.72648	3.47185	2.13279	3.47484	2.91873	3.28331	2.08458	2.47068		4	PR173 exp vs PR033 stat	0.35069	-0.35221	1.05359	0.224565
	4.43257	4.22689	3.54162	4.01378	2.36008	3.22195	2.64374	2.537	4.54995	8.28133	3.8623	3.87995	3.02138	3.37204	3.38042	3.6905	2.77174	2.69981	2.65078	3.0119	4.18724	2.25645	2.83299	3.19612	3.00963	3.66804	3.97325	2.6129	2.06931	3.44692		5	PR173 exp vs PR173 stat	0.24481	-0.31805	0.80766	0.291062
	3.93599	2.26643	3.1633	3.24204	3.23483	2.09686	3.84127	4.00126	4.86293	7.01526	2.14785	3.92475	2.42798	2.31787	3.88801	3.32449	2.41786	4.67291	3.07332	2.35311	3.28652	5.2545	2.32687	2.94538	2.04576	3.48264	2.61828	1.63874	2.90122	3.01206		6	PR173 exp vs PR188 exp	-0.62044	-1.08898	-0.15189	0.0247531
	2.56326	2.05915	4.14137	2.60824	2.47456	2.81434	3.29459	3.84722	3.61951	2.35295	7.13694	8.36784	2.52689	2.62586	3.22357	3.92502	2.63363	3.84522	3.14745	1.97935	2.88284	2.31517	2.98596	3.53398	2.77201	4.2186	2.11262	2.50055	5.12888	1.98357		7	PR173 exp vs PR188 stat	-0.57768	-1.11578	-0.03958	0.0435495
	2.48461	2.44762	2.94016	3.26113	2.001	2.35575	3.52742	2.5498	2.70809	2.79679	4.279	2.80409	3.12343	2.7813	2.63243	3.46047	2.57683	4.12864	2.3626	2.07031	2.61596	4.01676	1.99038	3.60864	3.05867	3.02503	2.23721	2.85192	3.5541	6.72016		8	PR173 exp vs PR196 exp	-0.60234	-1.06411	-0.14057	0.0248343
	4.20922	2.10391	2.41738	1.84113	3.28739	2.10105	4.05848	3.90062	11.8624	3.41036	3.87549	2.77966	2.71675	3.20849	3.45777	3.03516	3.19215	3.04155	2.83838	2.99365	2.24313	5.58775	2.46003	3.38907	2.84201	3.33252	2.10401	3.35108	2.30373	2.39904		9	PR173 exp vs PR196 stat	-0.69335	-1.23174	-0.15496	0.0303796
	2.57147	4.09212	2.81059	2.77394	2.49476	3.07924	2.65628	5.21605	5.44651	3.52197	12.6082	4.97657	2.57415	3.81909	3.30009	2.61947	2.91221	4.63949	3.46249	2.90051	4.24104	2.7553	3.23324	3.02877	2.41248	2.62621	2.24327	2.28704	1.82264	2.12518
	2.60641	2.71072	2.24632	2.83848	2.16861	2.36557	3.43691	2.12481	5.14888	2.44117	2.41649	4.50882	3.04319	2.45109	3.4159	5.73581	3.85068	4.12542	2.87315	1.86244	2.58294	2.18481	5.24898	3.91626	2.13791	3.13438	2.13681	7.12842	1.74087	2.31698		#	Condition	Difference	95%CI_lo	95%CI_hi	p value
	3.17392	3.89555	2.0635	2.74931	2.66734	2.329	2.40209	3.08779	3.19754	2.88798	3.73437	2.81807	2.27293	2.6519	7.54462	2.62722	3.47021	2.42592	2.8682	2.3946	2.77685	2.70711	2.66835	3.76334	2.22822	2.63144	3.35826	3.11798	2.11206	1.99346		1	PR188 exp vs WT exp	-0.08892	-0.38	0.20216	0.437919
	2.11774	2.27719	3.69983	1.98146	3.99883	2.61555	3.14118	3.79207	3.99007	3.13916	4.33737	2.58513	2.34262	3.29447	2.41756	2.76921	2.93992	3.24138	3.02194	2.78744	2.15889	2.75363	2.03516	2.74071	9.84483	3.63382	2.26836	3.61148	2.54177	3.34733		2	PR188 exp vs WT stat	-0.23772	-0.46424	-0.0112	0.0441396
	4.31038	3.20875	2.5342	2.86641	2.41938	3.14714	3.59631	5.2212	3.2715	6.32914	2.94421	2.94447	3.63195	13.3438	3.44308	3.23685	2.95774	2.54536	2.14717	3.06233	2.46054	2.99862	3.21593	2.75605	2.83223	3.13945	3.62061	8.43252	1.8969	3.62252		3	PR188 exp vs PR033 exp	0.80162	0.53626	1.06698	0.00113625
	2.97472	3.0862	2.47005	2.30822	3.03194	2.02733	4.03454	2.99601	2.35244	5.35813	3.78892	2.69343	2.82704	4.75534	4.77522	2.9759	4.47889	2.34999	2.17147	2.86222	1.98645	2.87906	5.83862	2.74213	2.77752	2.06699	2.70025	2.49717	2.71845	5.51699		4	PR188 exp vs PR033 stat	0.97112	0.20489	1.73735	0.0298553
	1.96187	3.02561	1.65961	3.77845	2.13244	2.88265	2.31932	2.36059	6.37468	5.41327	3.77448	4.67309	3.09762	2.82466	3.78046	6.15668	2.65231	2.86738	2.42227	2.5698	2.95472	3.37958	1.60284	2.73473	3.47186	2.48095	3.90605	3.08798	2.67161	3.14257		5	PR188 exp vs PR173 exp	0.62044	0.15189	1.08898	0.0247531
	2.82962	4.21064	2.3911	2.55189	2.21033	2.69655	2.1433	3.096	3.66406	3.01534	10.8683	4.25277	3.33511	2.42168	3.11355	2.18219	2.57695	3.60937	2.24086	4.01495	2.94533	3.20419	2.65375	2.44873	3.66828	2.29897	2.97949	2.65478	3.50397	2.70217		6	PR188 exp vs PR173 stat	0.86524	0.30016	1.43032	0.0180219
	3.92064	3.09075	2.42025	2.88282	2.02114	2.5404	3.00723	2.62311	2.12276	3.70886	2.24397	3.28747	2.71435	4.23343	4.39037	2.44858	3.81076	5.3822	2.44175	2.52749	3.91336	2.07093	2.85811	2.70309	2.48691	2.22216	2.24495	3.51552	2.98404	2.63232		7	PR188 exp vs PR188 stat	0.04276	-0.20079	0.2863	0.581056
	3.96715	3.21075	2.33301	2.35758	2.4434	3.01116	2.41537	3.92087	2.78365	2.45595	3.49195	2.9727	3.76527	3.34639	2.63701	3.29265	4.8987	3.82356	2.12755	2.48841	2.33078	3.90044	3.12955	3.03652	3.14086	3.2938	2.31848	3.91516	2.2468	2.1958		8	PR188 exp vs PR196 exp	0.0181	-0.25386	0.29005	0.86157
																																9	PR188 exp vs PR196 stat	-0.07291	-0.31677	0.17094	0.374959
																																#	Condition	Difference	95%CI_lo	95%CI_hi	p value
																																1	PR196 vs WT exp	-0.10702	-0.41012	0.19608	0.381423
																																2	PR196 exp vs WT stat	-0.25582	-0.51837	0.00674	0.0532634
																																3	PR196 exp vs PR033 exp	0.78352	0.50096	1.06609	0.00153717
																																4	PR196 exp vs PR033 stat	0.95302	0.2035	1.70255	0.029062
																																5	PR196 exp vs PR173 exp	0.60234	0.14057	1.06411	0.0248343
																																6	PR196 exp vs PR173 stat	0.84714	0.29377	1.40052	0.0170912
																																7	PR196 exp vs PR188 exp	-0.0181	-0.29005	0.25386	0.86157
																																8	PR196 exp vs PR188-stat	0.02466	-0.26047	0.30979	0.773722
																																9	PR196 exp vs PR196 stat	-0.09101	-0.37647	0.19445	0.340153

## Sheet: Fig. 4-fig. suppl. 3B
	Cell lengths raw data																									Statistics of individual replicates
	Cell length [µm]																									#	Condition	Replicate	n	Mean	SD	SEM	95%CI_lo	95%CI_hi	Median	p(Shapiro-Wilk)
	WT PYE			WT M2G			PR207 PYE			PR207 M2G			PR033 PYE			PR033 M2G			PR188 PYE			PR188 M2G				1	WT PYE	1	100	2.73462	0.64355	0.06435	2.60693	2.86232	2.61673	0
	Replicate 1	Replicate 2	Replicate 3	Replicate 1	Replicate 2	Replicate 3	Replicate 1	Replicate 2	Replicate 3	Replicate 1	Replicate 2	Replicate 3	Replicate 1	Replicate 2	Replicate 3	Replicate 1	Replicate 2	Replicate 3	Replicate 1	Replicate 2	Replicate 3	Replicate 1	Replicate 2	Replicate 3		2	WT PYE	2	100	2.62097	0.52516	0.05252	2.51677	2.72518	2.47115	0
	3.21567	2.19654	1.93968	2.81784	2.58029	2.47528	2.84086	5.1939	2.51033	4.1038	2.10016	4.13912	4.12565	2.06549	9.27257	3.10451	2.68263	2.65886	2.30463	4.31008	1.861	2.82222	2.22672	2.87816		3	WT PYE	3	100	2.62064	0.50238	0.05024	2.52096	2.72033	2.59468	0.001
	1.99813	2.30256	2.52182	2.35763	3.54597	2.96355	2.34956	5.2456	5.06039	3.74294	3.14909	3.62979	2.16035	2.22693	2.48312	2.48255	3.06638	2.48303	5.51595	2.58061	3.66802	2.84183	2.96696	2.39553		4	WT M2G	1	100	2.7075	0.71478	0.07148	2.56567	2.84933	2.69082	0
	2.59005	2.85136	2.53053	3.66193	2.93173	4.11491	6.39233	6.15217	3.75537	2.81063	3.44986	2.74093	3.74644	3.32792	4.67698	2.7299	3.04195	2.21936	2.20928	2.69435	3.9064	2.56571	3.37932	2.16158		5	WT M2G	2	100	2.54746	0.63058	0.06306	2.42233	2.67258	2.3395	0
	2.17204	2.46373	2.05833	1.87082	2.01549	2.34031	4.77487	2.76168	2.96091	3.017	2.5353	3.68275	1.8524	4.00037	6.32277	2.04825	2.13073	3.04585	2.97344	4.07153	1.80332	4.1154	2.21967	2.1859		6	WT M2G	3	100	2.6965	0.62629	0.06263	2.57223	2.82077	2.61916	0.005
	2.13751	2.45994	3.07741	2.76227	1.98933	2.29078	9.9112	2.56474	3.00149	3.0933	3.1547	3.80825	5.8974	2.63381	3.52695	3.6579	2.16237	1.86373	2.07824	2.58058	2.45705	2.77215	2.07756	4.14892		7	PR207 PYE	1	100	4.39712	2.63935	0.26394	3.87341	4.92082	3.54041	0
	2.13125	3.16899	3.201	1.98592	2.05031	2.28747	2.14309	2.16392	2.21051	2.05229	2.50733	3.13607	3.73459	3.02377	4.27825	1.84099	2.38089	2.81419	3.33401	3.41767	2.36689	2.35465	4.19216	3.3589		8	PR207 PYE	2	100	4.90135	2.04452	0.20445	4.49567	5.30702	4.20411	0
	3.11257	1.84582	1.85485	2.54754	4.2121	2.65604	3.66429	4.15895	2.42933	3.6685	2.58513	2.82214	3.67524	2.99469	6.88214	3.23305	4.18471	2.29541	2.68185	2.39342	1.73589	2.4936	2.87403	3.50213		9	PR207 PYE	3	100	4.14979	1.90207	0.19021	3.77238	4.5272	3.39685	0
	1.96524	3.26689	2.42705	1.95772	2.48633	2.33368	12.6467	3.12962	1.88328	2.32675	2.99917	3.04717	4.01601	5.12652	10.6727	1.83869	2.44908	3.22301	1.97214	2.3743	2.08758	3.81632	3.67674	2.45222		10	PR207 M2G	1	100	2.94515	0.60589	0.06059	2.82493	3.06537	2.84928	0.002
	3.38628	2.18479	2.34967	2.44259	2.34163	2.59446	4.64467	7.22384	4.99106	3.35037	2.64879	2.95581	2.28695	2.57494	2.64085	2.45051	2.06666	2.29642	2.95774	2.57138	2.54827	3.95192	2.2654	4.03863		11	PR207 M2G	2	100	3.1432	0.80685	0.08068	2.9831	3.3033	2.99796	0
	2.37752	2.67374	2.02613	1.99668	3.00498	2.82368	2.28192	8.44084	2.87237	3.14549	3.0218	3.01251	4.8981	4.96949	2.55789	1.98874	1.98858	1.98064	3.87039	2.08138	2.96778	2.39411	2.70123	2.21429		12	PR207 M2G	3	100	3.20791	1.09693	0.10969	2.99026	3.42557	2.96201	0
	3.4563	3.58568	2.56749	1.86118	2.63077	2.36972	3.93216	2.83987	4.02707	3.15205	2.99863	4.431	2.04588	5.0814	3.24431	2.65524	2.68098	1.96977	4.31046	1.36917	3.09751	3.4995	2.34348	3.14755		13	PR033 PYE	1	100	3.47852	1.37233	0.13723	3.20622	3.75082	2.96099	0
	2.82154	2.96719	2.18164	1.70735	2.17296	3.44167	2.04749	3.58113	3.22901	4.5813	2.92071	3.04922	2.56939	4.07824	4.66332	2.16763	2.36982	1.75039	3.08955	4.76423	2.77211	3.03044	2.51418	2.78557		14	PR033 PYE	2	100	4.13165	2.18895	0.2189	3.69732	4.56599	3.73919	0
	2.20934	2.25332	3.18313	3.84231	2.55263	3.46284	3.79941	6.65099	5.0719	2.58593	2.77586	2.56841	2.45231	4.76701	7.444	3.39205	2.93032	1.8016	2.11473	3.51926	3.22914	2.2411	2.49098	4.55493		15	PR033 PYE	3	100	3.99259	2.11434	0.21143	3.57306	4.41212	3.28917	0
	1.87463	3.36731	2.27457	3.07154	2.23971	2.96484	3.28494	3.85291	2.64446	3.44333	3.389	3.33941	2.18191	2.29045	3.59007	1.96255	3.47279	2.26454	2.68883	4.24807	2.66057	3.3949	2.7361	4.30124		16	PR033 M2G	1	100	2.56372	0.64896	0.0649	2.43495	2.69249	2.40822	0
	2.71733	2.2842	2.60246	3.20014	2.02649	4.98876	2.78916	6.30844	2.06635	2.21141	3.1298	3.93644	3.04341	4.96965	2.50585	1.8477	2.29453	3.33453	3.04998	2.94314	3.59702	2.58422	2.81858	2.93709		17	PR033 M2G	2	100	2.58625	0.59208	0.05921	2.46877	2.70373	2.45796	0.002
	2.92747	2.75692	2.90476	1.82632	2.69523	2.127	2.64373	3.5714	2.58487	3.59557	2.72042	3.34302	3.29395	4.3419	5.44128	1.99295	3.07609	3.30832	2.16371	2.54964	4.38357	3.09146	2.45089	3.04656		18	PR033 M2G	3	100	2.56653	0.97007	0.09701	2.37405	2.75902	2.29592	0
	3.0855	2.46916	2.78736	1.91649	2.00466	3.28198	4.02407	7.00655	3.0388	2.73221	2.92555	2.67504	2.24164	3.75985	4.43449	2.20221	2.70356	2.1696	2.57453	4.76265	2.96901	3.03003	2.5613	2.88521		19	PR188 PYE	1	100	2.89504	0.93899	0.0939	2.70872	3.08135	2.68534	0
	2.39091	2.06389	2.22204	1.9334	2.06472	3.21736	4.25789	2.16426	2.55689	2.99971	2.36811	4.61066	3.41362	8.09055	2.3517	2.34738	1.91795	2.30024	2.12575	2.16113	3.68881	2.70201	2.67539	3.35895		20	PR188 PYE	2	100	2.95649	1.25337	0.12534	2.7078	3.20519	2.68422	0
	1.81182	3.59024	2.90213	1.92377	2.19981	3.23932	2.89648	6.37562	2.36883	2.50085	3.39553	2.11271	2.76652	2.36015	2.49179	2.50847	2.15528	2.36329	2.50042	2.4434	2.50312	3.42061	2.07734	3.34118		21	PR188 PYE	3	100	2.96614	0.87639	0.08764	2.79224	3.14004	2.90374	0
	2.56953	2.26965	2.78907	2.71658	2.42453	1.71149	4.19778	8.99295	2.97119	3.16801	2.70468	3.50651	3.4053	3.86203	3.74772	3.78253	2.65712	1.96435	2.38538	3.22312	3.69371	3.54294	1.9455	2.37338		22	PR188 M2G	1	100	3.087	0.74454	0.07445	2.93927	3.23474	2.85425	0
	3.50002	3.15888	2.48502	1.54155	2.01817	3.9753	3.26215	5.2828	6.47385	2.7574	3.46127	2.90961	6.60121	2.18718	5.80421	2.05251	1.58682	1.8918	1.79969	2.24353	2.91363	2.30657	2.51162	2.4265		23	PR188 M2G	2	100	2.93409	0.78375	0.07837	2.77858	3.0896	2.75245	0
	2.96383	2.45644	3.66965	3.41077	2.08829	2.79473	3.75429	5.58236	4.2875	4.47099	2.40081	2.7671	2.50277	2.09691	2.83793	2.07024	2.90684	2.5245	3.27056	2.81572	2.13132	2.49022	2.52963	2.48732		24	PR188 M2G	3	100	3.07509	0.68879	0.06888	2.93842	3.21176	2.93325	0
	2.55591	2.37082	2.96005	2.68243	2.29665	2.60733	2.15349	2.26258	7.64628	2.11366	3.08467	2.54493	2.56662	2.27059	2.94552	1.96572	3.37488	1.71363	1.99791	1.94474	2.29731	2.4275	3.02748	3.48492
	2.6868	3.70156	2.93355	1.92581	2.05078	1.87428	3.91273	2.82168	2.96411	3.38699	2.88564	2.48563	3.83248	5.43074	2.77768	2.0511	2.55286	1.80643	2.57137	1.90164	2.68125	2.68276	2.30697	2.8572
	2.49904	2.17049	1.87633	3.69375	2.17857	2.26682	3.41863	3.61397	5.81174	4.57189	4.22453	4.17667	2.24121	6.72165	3.48456	2.40351	2.91764	3.187	2.55447	2.08651	2.31569	2.86667	2.75391	2.93655		Statistics of conditions
	2.58466	3.06951	3.27883	3.76022	1.80288	1.92574	5.21442	3.87753	1.97951	2.99867	2.37636	2.80732	2.68362	4.55948	2.10291	2.82019	2.3155	1.7041	3.47066	3.79599	4.32205	2.50148	3.79822	2.99256
	3.23185	2.65455	1.76056	1.98297	2.33879	3.34307	5.34642	3.89791	2.60334	2.83947	4.06125	3.65104	4.37676	3.13758	3.03133	4.30456	2.11875	2.6748	3.11719	1.73418	3.32063	3.47865	3.83261	2.83911		#	Condition	n	Mean	SD	SEM	95%CI_lo	95%CI_hi
	2.70306	2.16959	1.80556	4.33074	4.12097	3.2136	5.14818	6.74193	2.4165	2.98503	4.18251	2.55468	2.84697	2.10521	5.22688	3.57258	3.01682	2.82409	1.74712	3.63464	4.747	3.97313	2.31908	2.42594		1	WT PYE	3	2.65875	0.06571	0.03794	2.49551	2.82198
	2.37032	2.06291	3.31646	1.98136	2.63203	2.49153	3.54658	4.66471	3.01826	2.65262	2.42509	4.35707	3.04145	4.84132	2.09615	1.63608	2.51168	3.13017	3.4572	3.08586	1.70122	2.28994	2.7573	2.92995		2	WT M2G	3	2.65048	0.0894	0.05161	2.42841	2.87256
	2.0473	2.02079	2.26968	1.72536	2.4665	2.87234	3.46806	8.93717	3.42757	2.51921	2.0676	2.53401	1.84604	6.47364	1.81346	2.55057	1.83982	2.04795	4.94251	2.59303	1.88976	2.72514	3.46247	3.76807		3	PR207 PYE	3	4.48275	0.38303	0.22114	3.53126	5.43424
	2.49327	2.52	2.74788	2.08585	2.02774	1.86462	4.03536	5.41338	3.44536	2.15495	3.11856	2.55317	4.14948	3.95513	4.22999	3.43566	3.35368	2.91868	4.60481	2.70265	3.17474	2.59997	2.05346	2.66518		4	PR207 M2G	3	3.09875	0.13691	0.07904	2.75866	3.43884
	2.53347	2.2197	2.37864	4.06217	2.46452	1.78711	5.99896	2.43178	2.97186	2.89494	3.3555	2.80293	2.29487	2.292	2.18416	3.11331	2.28797	2.2932	2.37899	3.98523	4.30681	2.52249	2.65866	3.49715		5	PR033 PYE	3	3.86759	0.34404	0.19863	3.01294	4.72224
	2.52946	2.81859	4.31734	3.42973	2.34021	3.27172	2.88441	8.81868	3.66617	2.61187	2.39066	3.43306	2.35305	2.29674	2.36217	2.05161	2.43727	3.17834	3.48836	2.25205	3.76573	2.68365	2.4119	3.58635		6	PR033 M2G	3	2.57217	0.01228	0.00709	2.54167	2.60267
	3.08142	2.39171	2.69625	2.92504	2.26476	1.83802	8.43037	3.58835	6.03911	3.2383	2.32175	11.0926	2.44664	3.74401	3.49818	3.44513	2.57737	1.91623	2.64154	2.74488	2.6349	2.50708	3.2947	2.46274		7	PR188 PYE	3	2.93922	0.03857	0.02227	2.84341	3.03504
	2.11004	2.09823	2.59882	4.09221	3.53645	2.489	5.38603	5.71952	2.88304	2.7557	2.84092	3.00286	2.44631	11.3581	4.1585	3.30913	2.76187	2.9707	2.25674	2.04214	2.69126	2.35886	3.07648	3.7306		8	PR188 M2G	3	3.03206	0.08505	0.04911	2.82078	3.24334
	2.13855	2.88917	2.95972	3.32964	4.37789	2.24679	4.66367	6.82942	2.4847	2.78165	3.26011	2.65576	2.75282	4.16688	16.1338	2.57188	2.22767	3.26119	2.18813	2.53228	2.97695	2.29121	2.43267	2.59082
	2.98403	2.53102	2.63245	1.8652	2.22987	2.35492	5.77621	7.79045	7.02591	2.10967	3.94566	2.11137	6.27014	5.99725	2.6308	2.2519	2.2347	1.99502	1.5127	2.81912	1.64703	4.68173	2.31743	4.25156
	2.84868	2.11366	2.45029	2.00883	2.74832	3.01504	4.11252	3.35184	5.92658	1.97188	3.48154	4.15329	3.91838	6.05803	6.06159	2.25078	3.60134	1.79403	2.59182	3.81389	3.65713	3.81131	4.97833	2.70697		Statistics of comparison of means between conditions
	2.5177	2.56155	2.29317	3.45647	2.21837	2.4317	4.07709	5.21761	1.97989	2.70243	2.70639	2.61627	2.80704	4.62821	2.76939	3.24186	2.22958	1.84696	4.57094	3.88965	1.73516	2.67652	2.988	2.59382
	2.0564	2.61755	2.0091	3.79201	2.00422	2.78087	6.31103	3.93713	2.62422	2.55754	3.79534	2.34576	2.75072	8.43421	2.15342	3.28174	1.97271	2.78754	2.09817	3.0688	3.29338	4.50984	4.11334	2.2659		#	Condition	Difference	95%CI_lo	95%CI_hi	p value
	2.66313	2.75269	2.0918	3.13042	2.49746	2.65405	2.64265	2.96499	4.53079	2.25225	3.16863	3.27082	2.56111	2.46223	2.46168	3.91283	2.04727	3.33882	3.30012	4.04061	6.33733	3.83462	3.62534	2.15933		1	WT PYE vs WT M2G	-0.00826	-0.19254	0.17601	0.904122
	1.97172	2.51612	2.57327	2.27902	2.4259	2.49594	4.62408	6.08423	6.6716	2.27882	2.43233	4.13222	5.75117	6.01745	2.49387	2.12876	2.56441	3.00858	3.49166	1.66027	2.56871	3.73667	2.10732	4.87272		2	WT PYE vs PR207 PYE	1.824	0.90822	2.73979	0.0124788
	2.17057	2.59187	3.66179	3.63009	3.35576	3.13543	2.85335	7.81905	3.38854	1.97078	2.1958	3.51757	4.24114	3.3206	4.55972	1.91517	2.0496	4.42023	2.77866	2.15608	1.83866	2.40294	2.10731	2.68856		3	WT PYE vs PR207 M2G	0.44001	0.154	0.72602	0.0168588
	2.92068	3.51525	2.74657	2.72119	2.19991	2.81805	1.92067	4.65223	10.3243	3.51431	2.15534	2.90096	2.89376	2.77178	3.0578	1.64282	3.20622	1.63096	2.07835	1.85208	3.68525	2.51048	3.22006	2.62582		4	WT PYE vs PR033 PYE	1.20884	0.39298	2.0247	0.0226938
	2.49923	2.561	2.39728	3.79101	3.26561	2.57015	13.4657	10.5072	7.18555	3.30147	2.10789	2.12952	7.28923	4.17182	2.5149	2.6351	2.66517	3.352	2.42136	3.3653	5.00527	2.88685	2.89435	3.09111		5	WT PYE vs PR033 M2G	-0.08658	-0.24269	0.06953	0.145764
	2.8771	2.44403	2.09936	2.6992	1.93335	2.84614	3.53424	3.857	8.16881	2.64437	3.61641	3.95588	2.69198	3.69068	2.9241	3.91043	2.27961	3.0185	3.92692	3.08231	2.65851	2.95445	2.37035	2.72542		6	WT PYE vs PR188 PYE	0.28048	0.14599	0.41496	0.0062186
	2.88572	2.18213	2.52344	2.38325	2.10382	3.53881	2.35125	5.57229	2.26723	2.69303	2.21517	2.76964	2.46483	3.62066	5.66751	2.26572	1.88367	3.14906	1.8927	3.47355	4.22881	3.194	2.70958	2.82822		7	WT PYE vs PR188 M2G	0.37331	0.19661	0.55002	0.00467691
	1.98479	4.61432	2.34994	1.91324	2.2882	2.00758	2.65193	7.24341	4.54754	3.39151	3.67246	3.14226	2.95563	9.17976	7.17379	1.40202	1.99808	3.52793	1.90132	1.7115	2.69408	2.63137	7.43626	2.71495
	3.26732	2.42094	2.6924	3.48041	2.18288	2.10796	3.31282	2.64096	5.58223	3.34914	2.96698	2.96509	3.33919	7.12153	2.68104	3.39411	3.7066	2.50969	2.38554	3.44898	3.6849	2.66037	2.54108	3.04922		#	Condition	Difference	95%CI_lo	95%CI_hi	p value
	2.08586	2.32823	2.6412	2.38697	2.03531	2.55873	5.47347	4.04932	2.36547	3.28626	3.47349	2.71668	3.81705	2.88829	6.61447	1.89992	2.55932	3.0395	3.25593	3.30622	3.46002	4.91005	2.23083	2.85182		1	WT M2G vs WT PYE	0.00826	-0.17601	0.19254	0.904122
	2.39546	2.64092	2.13806	2.93701	2.81925	2.00301	2.73937	5.13183	2.19099	2.8529	3.43245	2.6335	2.40358	3.9202	2.09248	2.0576	2.31966	3.32993	2.32913	2.29493	2.06083	2.99247	2.51144	2.3903		2	WT M2G vs PR207 PYE	1.83227	0.94144	2.72309	0.0110132
	2.80324	2.03589	3.23557	1.85975	3.17969	2.0864	2.4962	6.00607	2.66403	3.26352	3.15326	1.85804	6.72718	4.77138	2.8166	2.06101	3.88098	2.29061	2.02811	2.12945	3.17359	3.05304	2.66285	2.64456		3	WT M2G vs PR207 M2G	0.44827	0.16857	0.72796	0.0128889
	3.00476	2.33336	2.23577	3.27921	2.63448	2.77963	2.08226	7.39304	3.07579	3.18785	3.26827	3.36667	2.48283	2.03458	5.08341	3.85873	2.17134	2.23683	5.4323	1.6647	1.60607	2.87269	2.50196	2.11014		4	WT M2G vs PR033 PYE	1.2171	0.42713	2.00707	0.0201126
	2.45034	2.44436	3.47487	1.85992	2.12319	2.44677	5.94909	5.91574	6.2492	3.53175	2.69027	3.83351	4.32266	6.84184	2.45639	3.25841	2.41119	2.73457	3.27355	1.99298	2.89385	3.71802	4.11319	3.12359		5	WT M2G vs PR033 M2G	-0.07832	-0.29484	0.13821	0.2673
	3.77943	2.46093	2.69715	1.9688	4.50175	1.66769	3.17669	4.15433	6.89358	2.63049	2.4446	3.28225	2.29416	4.72225	6.25817	1.90838	2.46683	2.21291	2.55327	11.3747	2.29863	4.12667	2.62618	2.55707		6	WT M2G vs PR188 PYE	0.28874	0.09895	0.47853	0.0181057
	2.51924	2.36333	2.11879	3.02778	3.28169	2.95108	7.27785	6.00721	3.40517	3.20988	3.60476	2.36228	2.95198	1.79037	3.76087	2.03214	2.78384	3.68489	2.45773	6.54401	2.25978	2.27053	3.01916	2.52881		7	WT M2G vs PR188 M2G	0.38158	0.18359	0.57956	0.00590245
	2.69416	2.08019	2.05175	2.66065	2.50366	2.67264	2.25087	7.81651	7.93865	2.23886	2.67884	2.70953	3.67735	1.89641	3.92576	2.55026	2.67264	1.66738	2.31718	2.62978	3.86898	2.41368	2.35176	2.24775
	3.33404	2.43628	2.45558	2.21816	2.30168	3.03885	3.67631	4.67278	4.74983	3.68651	3.41818	6.41847	2.65552	4.20222	3.06977	2.31012	2.01349	1.88232	3.36062	2.26208	2.36066	3.23166	3.74629	2.40833		#	Condition	Difference	95%CI_lo	95%CI_hi	p value
	2.01703	2.18484	1.9895	3.37079	2.00825	1.78152	4.29146	5.1684	2.39972	3.50673	4.71251	2.61886	3.26269	3.42409	2.33051	3.34142	2.26679	3.71914	2.20786	4.38841	2.58348	3.05978	2.3993	4.15225		1	PR207 PYE vs WT M2G	-1.83227	-2.72309	-0.94144	0.0110132
	4.08952	3.04195	2.84206	1.83461	2.1149	2.07734	2.26857	7.57133	5.2765	2.2592	3.34835	2.88269	2.33342	9.50781	3.29087	3.46026	2.76966	3.34101	2.91236	1.95762	3.27084	2.6463	2.41126	2.45797		2	PR207 PYE vs WT PYE	-1.824	-2.73979	-0.90822	0.0124788
	2.65557	2.71942	2.59054	4.20199	2.64489	2.04599	2.57471	6.20835	2.49513	2.3266	2.83262	3.18214	2.81322	4.30898	2.38405	3.26385	3.18026	1.983	3.02714	1.76901	2.52483	4.19974	3.80165	2.32263		3	PR207 PYE vs PR207 M2G	-1.384	-2.2228	-0.54519	0.0158995
	2.54217	2.15287	2.29762	3.19278	2.28368	2.65223	10.4552	8.04102	3.03899	3.6168	3.4605	2.31264	4.22781	2.71738	2.52567	2.41595	3.49813	3.37014	2.4417	2.92826	2.32722	4.01835	2.7828	3.22958		4	PR207 PYE vs PR033 PYE	-0.61516	-1.4442	0.21388	0.108088
	2.55433	2.49504	2.03252	2.98294	2.02888	2.59036	2.88838	5.34691	3.71379	2.59661	2.36446	2.61704	3.61632	8.08002	8.16621	2.32451	2.37352	2.28143	3.46511	1.83629	3.27876	3.73371	2.85724	2.48102		5	PR207 PYE vs PR033 M2G	-1.91058	-2.8607	-0.96047	0.0130649
	2.52342	2.98598	2.60855	3.73289	4.6307	1.9764	4.98228	2.09944	3.51357	3.03024	4.73589	3.12252	2.55029	2.49547	3.08116	2.71358	2.84889	2.01039	3.41333	2.41231	2.94135	3.1498	2.13303	2.8749		6	PR207 PYE vs PR188 PYE	-1.54353	-2.48185	-0.60521	0.0190695
	1.85507	2.42085	2.74571	2.16466	2.03465	1.80434	8.26228	4.0699	6.42015	2.15033	2.84757	2.94131	4.7084	1.97776	4.20151	2.37085	3.16103	3.36893	2.53601	2.32853	3.23564	2.56378	3.19743	3.40736		7	PR207 PYE vs PR188 M2G	-1.45069	-2.3463	-0.55508	0.01853
	3.48789	2.65162	2.79849	2.0497	2.03444	3.28169	2.5626	2.9767	6.10561	2.52213	2.83111	3.0232	2.44039	2.36175	5.16467	3.2784	2.6903	1.69993	3.72705	3.42371	3.3226	3.20516	3.08872	3.0773
	3.41494	2.95238	3.60939	1.76566	2.33293	2.84138	2.40139	1.92663	6.78106	2.84566	3.24461	3.16587	6.60595	3.47303	3.21424	2.30192	3.1337	1.91083	6.08411	4.11189	2.42016	3.60729	2.37354	4.15323		#	Condition	Difference	95%CI_lo	95%CI_hi	p value
	2.58526	2.49909	2.96692	2.9028	2.47132	2.37933	2.56874	4.31853	5.78926	2.92103	2.80894	3.83124	2.51614	2.26777	1.69096	2.36335	1.97899	1.95785	2.20024	2.82647	2.92499	2.10846	3.3747	3.6467		1	PR033 PYE vs WT M2G	-1.2171	-2.00707	-0.42713	0.0201126
	2.62522	2.31264	2.48974	3.3512	2.26648	3.75365	10.1571	3.29452	2.69453	4.2555	4.21907	2.78757	2.74854	3.69199	7.0967	2.4965	3.27497	9.07231	1.77627	2.32981	1.57392	3.28711	2.77714	2.1769		2	PR033 PYE vs WT PYE	-1.20884	-2.0247	-0.39298	0.0226938
	2.27351	3.30368	2.83177	3.7965	2.23305	3.45407	8.75901	3.99513	3.5419	1.93654	4.58394	2.26351	4.01508	3.50564	3.46466	2.41294	3.11996	1.78723	2.26288	2.954	6.16385	3.02488	3.03171	3.89291		3	PR033 PYE vs PR207 PYE	0.61516	-0.21388	1.4442	0.108088
	2.06911	4.56542	4.37891	3.48178	2.43384	2.63099	2.68002	2.70687	2.51162	3.9793	2.85959	4.02262	5.55779	2.0719	2.93793	1.96864	3.30697	5.60849	2.64551	2.09881	3.11427	4.27586	4.24086	3.26778		4	PR033 PYE vs PR207 M2G	-0.76884	-1.50897	-0.02871	0.045885
	1.91352	3.33229	2.39934	3.70746	2.43498	2.94655	2.17474	3.61678	3.17355	2.23746	3.93903	2.36186	2.59824	3.99297	4.7233	2.67231	1.75432	3.33319	3.4508	4.06281	4.00775	2.78997	2.75476	3.91119		5	PR033 PYE vs PR033 M2G	-1.29542	-2.14854	-0.4423	0.0225966
	3.3042	2.15247	2.90794	3.02504	1.75983	2.3902	3.67623	4.23976	3.03922	2.96613	3.47252	2.45953	4.36294	3.32005	3.7554	3.10231	2.01531	2.70783	2.1437	2.89224	3.2759	2.82095	2.3503	3.63375		6	PR033 PYE vs PR188 PYE	-0.92837	-1.76848	-0.08825	0.041348
	2.81294	2.69846	3.41944	2.24775	2.21342	2.1667	4.78217	8.2043	2.43818	3.23406	2.55052	2.19395	3.41083	2.24286	2.52062	2.25373	1.79544	1.78863	2.76123	2.67374	1.98578	5.23485	2.91947	3.59865		7	PR033 PYE vs PR188 M2G	-0.83553	-1.63038	-0.04068	0.045185
	1.89535	2.37188	2.61115	2.76186	2.06981	2.2334	2.63327	3.69988	5.73058	2.23868	2.65127	3.80011	6.17742	2.24157	5.95213	1.8388	2.05705	1.94674	2.15715	3.23696	2.13821	2.73239	2.38305	2.36592
	2.81702	2.95926	2.61221	2.23569	4.3879	2.71634	2.97358	4.16845	3.20501	3.55267	3.41615	3.85637	2.96636	8.44662	4.54317	2.11672	1.77379	2.79469	2.31429	2.48528	2.45875	3.55521	3.43216	2.82483		#	Condition	Difference	95%CI_lo	95%CI_hi	p value
	3.15288	3.68332	2.38118	1.90665	3.78414	2.86514	5.93026	2.94195	8.32949	2.63388	2.82129	2.63582	2.87139	2.8049	4.81227	1.82763	2.28591	1.8651	2.83286	2.1328	1.92772	2.30055	3.80081	2.09437		1	PR188 PYE vs WT M2G	-0.28874	-0.47853	-0.09895	0.0181057
	5.7042	2.72377	2.09715	1.95338	2.61698	3.48397	2.50734	3.34201	2.2962	2.72488	2.5167	1.80845	3.09219	3.84439	4.72794	2.04352	1.85464	2.12635	2.97162	3.81443	3.35031	2.90076	2.90792	2.62906		2	PR188 PYE vs WT PYE	-0.28048	-0.41496	-0.14599	0.0062186
	3.03014	2.59482	2.63794	3.13015	2.05411	2.22678	3.74107	3.74472	3.45561	2.57437	2.50502	1.96603	2.84118	2.72275	2.76785	3.20124	2.78043	1.84634	1.74334	2.79843	2.08203	2.42332	2.16909	3.87065		3	PR188 PYE vs PR207 PYE	1.54353	0.60521	2.48185	0.0190695
	4.6879	2.23352	2.44492	2.77648	2.39186	3.50617	3.11721	1.93722	4.04702	2.26426	7.16306	3.45886	2.17626	3.94813	2.46912	2.00106	2.31865	2.00104	4.59398	2.22818	2.07161	4.42903	3.15166	2.15369		4	PR188 PYE vs PR207 M2G	0.15953	-0.15145	0.47051	0.173893
	4.21784	2.40376	1.92722	2.11712	2.38933	2.31525	3.27569	5.49355	2.04809	2.64807	2.66991	3.06212	2.63388	2.44921	2.56691	2.13521	1.86198	2.30859	2.78574	1.93619	3.27876	5.75096	2.83707	4.18887		5	PR188 PYE vs PR033 PYE	0.92837	0.08825	1.76848	0.041348
	2.37912	2.61171	2.22949	2.04298	2.99812	2.93034	5.66811	2.92089	2.19764	3.52068	2.23454	3.51454	3.12065	2.32244	2.64297	2.01948	2.72752	2.22517	3.11147	2.67409	2.87678	3.89942	2.75099	2.71156		6	PR188 PYE vs PR033 M2G	-0.36705	-0.4531	-0.281	0.00177207
	2.36083	2.14287	2.63574	3.48117	2.52723	3.33992	1.71965	6.72568	6.10869	2.43367	4.10437	3.4287	3.08487	2.79137	2.26572	2.54708	3.00451	1.94313	1.8313	3.36038	2.72953	2.71679	2.54418	2.97064		7	PR188 PYE vs PR188 M2G	0.09284	-0.08633	0.27201	0.190444
	3.34059	2.14378	3.29571	2.86367	3.36118	1.7962	3.09102	2.49766	5.87161	2.42436	6.20016	2.51145	2.62599	3.88607	3.72197	4.11211	3.56393	1.4294	2.82892	2.44618	1.84987	3.73428	3.08002	2.17933
	3.40469	2.47315	2.97365	2.02465	2.13154	2.48741	3.28734	2.60946	2.29433	2.52543	3.89507	2.67709	2.30991	2.03456	3.62823	2.41519	1.7067	2.88681	1.66699	2.72648	3.47185	2.77426	2.36983	3.0325
	4.01378	2.36008	3.22195	2.36817	2.30853	3.03304	4.17176	6.82598	2.97719	2.44732	2.99729	2.16193	8.28133	3.8623	3.87995	3.03999	2.71105	2.32448	2.25645	2.83299	3.19612	2.60623	2.96175	4.19112
	3.24204	3.23483	2.09686	3.28654	3.38709	4.10714	2.69342	3.56932	4.74896	4.63945	2.69529	2.52793	7.01526	2.14785	3.92475	2.00013	2.27	2.38142	5.2545	2.32687	2.94538	2.38924	2.39745	3.50931
	2.60824	2.47456	2.81434	3.14971	2.57486	2.56941	2.69852	2.752	5.91938	3.21606	3.20879	3.46042	2.35295	7.13694	8.36784	2.9805	3.13106	3.86868	2.31517	2.98596	3.53398	2.43409	4.05358	3.30711
	3.26113	2.001	2.35575	2.30788	2.06614	2.92416	3.36006	3.4626	7.57419	2.63945	2.32152	4.93472	2.79679	4.279	2.80409	2.58485	1.8737	1.96955	4.01676	1.99038	3.60864	2.72682	2.90957	4.23461
	1.84113	3.28739	2.10105	2.0027	2.06968	3.60485	2.17239	9.58217	2.88441	3.11774	3.70115	4.32078	3.41036	3.87549	2.77966	2.47847	1.90937	1.78031	5.58775	2.46003	3.38907	3.53413	2.68707	2.89639
	2.77394	2.49476	3.07924	1.97066	2.07018	2.90829	12.1006	2.9959	3.20422	2.85814	2.58801	2.65598	3.52197	12.6082	4.97657	2.18244	3.52619	2.21726	2.7553	3.23324	3.02877	2.49298	2.43733	3.14203
	2.83848	2.16861	2.36557	2.63752	2.91507	2.06729	4.46809	8.6112	6.51242	3.76128	3.32786	3.29428	2.44117	2.41649	4.50882	1.66583	2.06567	2.70655	2.18481	5.24898	3.91626	4.06724	3.41866	3.2909
	2.74931	2.66734	2.329	3.19413	2.13805	2.77105	2.57844	7.26121	3.28377	2.43801	2.61564	4.28129	2.88798	3.73437	2.81807	3.5176	2.38436	2.70047	2.70711	2.66835	3.76334	3.60025	4.94555	3.47686
	1.98146	3.99883	2.61555	3.34952	2.62241	3.30395	8.48048	3.29396	2.51412	3.19166	3.38488	4.15354	3.13916	4.33737	2.58513	1.98238	4.62822	2.52346	2.75363	2.03516	2.74071	2.88179	3.94866	4.28711
	2.86641	2.41938	3.14714	3.02767	2.08503	2.45781	4.36625	3.08296	2.06541	3.4188	4.80273	2.95893	6.32914	2.94421	2.94447	2.37534	2.88163	1.93095	2.99862	3.21593	2.75605	2.26857	3.28607	2.751
	2.30822	3.03194	2.02733	2.18933	2.05895	2.23453	6.67284	5.12456	7.1346	2.83696	3.41195	4.53759	5.35813	3.78892	2.69343	1.85427	3.49722	1.65685	2.87906	5.83862	2.74213	2.12833	2.70542	4.189
	3.77845	2.13244	2.88265	2.51282	2.74834	1.81223	2.89234	7.7573	4.57183	2.97081	2.82038	2.56799	5.41327	3.77448	4.67309	3.37854	2.32927	1.8947	3.37958	1.60284	2.73473	2.36274	2.39153	5.03491
	2.55189	2.21033	2.69655	3.62227	2.53731	3.47262	2.38244	3.12423	7.54702	2.61823	2.40247	2.94439	3.01534	10.8683	4.25277	1.92792	2.15356	3.96432	3.20419	2.65375	2.44873	2.12187	2.81343	3.34457
	2.88282	2.02114	2.5404	2.35751	3.19487	2.16842	15.2526	3.48678	6.99901	2.68113	3.59601	2.78164	3.70886	2.24397	3.28747	2.7247	3.06591	1.7656	2.07093	2.85811	2.70309	4.11969	4.26709	3.09903
	2.35758	2.4434	3.01116	2.96301	3.32129	4.03287	3.09022	3.69016	4.41596	3.11431	2.89628	2.63672	2.45595	3.49195	2.9727	2.92344	2.17658	2.04678	3.90044	3.12955	3.03652	2.57283	2.67229	2.26475

## Sheet: Fig. 4-fig. suppl. 3C
	Ampicillin spot dilution assays uncropped images

[truncated: 25 more sheets: Fig. 4-fig. suppl. 4A, Fig. 4-fig. suppl. 4C, Fig. 4-fig. suppl. 4D, Fig. 5B, Fig. 5C, Fig. 6B, Fig. 6C, Fig. 6D, Fig. 6E, Fig. 7B, Fig. 7C, Fig. 7D, Fig. 8B, Fig. 8C, Fig. 8E, Fig. 8-fig. suppl. 1B, Fig. 8-fig. suppl. 1E, Fig. 8-fig. suppl. 2F, Fig. 9B, Fig. 9D …]
